# Supplementary material for: Vitamin D supplementation in Saudi Arabia: mothers’ knowledge, practices, and attitudes
Source: PeerJ journal article supplement (doi:10.7717/peerj.19781), 2025-08-28
Supplement: QuestionnaireEng.pdf [file QuestionnaireEng.pdf]

# Vitamin D supplementation in Saudi Arabia: Mothers' perception - A cross sectional study

## Research Tools

### 1. Demographic characteristics questionnaire

|                                                                                                         |                                                                                                                                                                                                     |
|---------------------------------------------------------------------------------------------------------|-----------------------------------------------------------------------------------------------------------------------------------------------------------------------------------------------------|
| <b>1.Age</b><br>Less than 25<br>≥25<30<br>≥30<35<br><35                                                 | <b>7.Your youngest child in months</b><br>1-12<br>>12<24<br>24 and more                                                                                                                             |
| <b>2. Marital status</b><br>Married<br>Divorced<br>Widower                                              | <b>8.Living location</b><br>Owing house<br>Rented house                                                                                                                                             |
| <b>3.Educational level</b><br>Uneducated<br>Primary<br>Average<br>Secondary<br>BA<br>Master's and above | <b>9.Monthly income</b><br>Less than 5,000 riyals per month<br>From 5 - less than 10000 riyals per month<br>From 10-20 thousand riyals per month<br>More than 20 thousand riyals per month together |
| <b>4. Functional status</b><br>Employee<br>Unemployed                                                   | <b>10.How to breastfeed the youngest children</b><br>Breast feeding<br>Bottle feeding<br>Both                                                                                                       |
| <b>5.Nationality</b><br>Saudi<br>Non-Saudi                                                              |                                                                                                                                                                                                     |
| <b>6.Number of children</b><br>One child<br>Two children<br>Three kids<br>Four children and more        |                                                                                                                                                                                                     |

### 2. Vitamin D knowledge questionnaire

| 1.Have you heard of Vitamin D?       |          |   |
|--------------------------------------|----------|---|
| Yes                                  | 1 point  | 1 |
| No                                   | 0 points |   |
| 2.Is there vitamin D in breast milk? |          |   |
| Yes                                  | 1 point  | 1 |
| No                                   | 0 points |   |

|                                                                                                |          |                   |
|------------------------------------------------------------------------------------------------|----------|-------------------|
| I don't know                                                                                   | 0 points |                   |
| <b>3.What is the source you learned about vitamin D? (You can choose more than one answer)</b> |          |                   |
| TV, radio, advertisements                                                                      | 1 point  | 7                 |
| Social media (Snapchat, Instagram, Facebook...)                                                | 1 point  |                   |
| Friends – family                                                                               | 1 point  |                   |
| Doctor/Nurse                                                                                   | 1 point  |                   |
| Magazines                                                                                      | 1 point  |                   |
| Books                                                                                          | 1 point  |                   |
| From studying at school/university                                                             | 1 point  |                   |
| Other                                                                                          |          |                   |
| <b>4.What are the benefits of vitamin D (you can choose more than one answer)</b>              |          |                   |
| Bone health*                                                                                   | 1 point  | 12                |
| Boosts immunity*                                                                               | 1 point  |                   |
| Helps a healthy pregnancy*                                                                     | 1 point  |                   |
| Prevents stroke*                                                                               | 1 point  |                   |
| Prevents diabetes*                                                                             | 1 point  |                   |
| Prevents high blood pressure*                                                                  | 1 point  |                   |
| Prevents arthritis*                                                                            | 1 point  |                   |
| Prevent depression*                                                                            | 1 point  |                   |
| Important for hair health*                                                                     | 1 point  |                   |
| Prevents obesity and weight gain*                                                              | 1 point  |                   |
| Important for skin health*                                                                     | 1point   |                   |
| Important for child health and development*                                                    | 1 point  |                   |
| I do not know                                                                                  | 0 points |                   |
| <b>5. What are the sources of Vitamin D? (You can choose more than one answer) 3</b>           |          |                   |
| The sun*                                                                                       | 1 point  |                   |
| The food*                                                                                      | 1 point  |                   |
| Food Supplements*                                                                              | 1 point  |                   |
| I do not know                                                                                  | 0 points |                   |
| <b>6.Where is Vitamin D found in food? (You can choose more than one answer)</b>               |          |                   |
| Milk and dairy products*                                                                       | 1 point  | 4                 |
| Fruits                                                                                         | 0 point  |                   |
| Vegetables                                                                                     | 0 points |                   |
| Fish*                                                                                          | 1 point  |                   |
| Yolk*                                                                                          | 1 point  |                   |
| Liver*                                                                                         | 1 point  |                   |
| I do not know                                                                                  | 0 point  |                   |
|                                                                                                |          | <b>Score 0-28</b> |

### 3. Vitamin D practice related to your child questionnaire:

|                                                             |   |  |
|-------------------------------------------------------------|---|--|
| <b>1. I expose my child to the sun daily</b>                |   |  |
| Yes                                                         | 1 |  |
| No                                                          | 0 |  |
| <b>2. What part of the child's body exposed to the sun?</b> |   |  |
| I do not expose my child to the sun                         | 0 |  |
| Face only                                                   | 1 |  |

|                                                                                            |   |             |
|--------------------------------------------------------------------------------------------|---|-------------|
| Hands only                                                                                 | 1 |             |
| Feet and legs                                                                              | 2 |             |
| All the body*                                                                              | 3 |             |
| <b>3. Do you expose your child to the sun?</b>                                             |   |             |
| Directly*                                                                                  | 1 |             |
| Indirectly (Behind the glass, for example)                                                 | 0 |             |
| <b>4. What time do you expose your child to the sun?</b>                                   |   |             |
| I do not expose my child to the sun                                                        | 0 |             |
| Before ten in the morning*                                                                 | 2 |             |
| After three in the afternoon                                                               | 1 |             |
| Other times                                                                                | 1 |             |
| <b>5. What is the average number of hours your child is exposed to the sun per week?</b>   |   |             |
| I do not expose my child to the sun                                                        | 0 |             |
| Less than an hour                                                                          | 1 |             |
| From one to two hours                                                                      | 2 |             |
| 6 hours and more*                                                                          | 3 |             |
| <b>6. Do you know the appropriate dose for exposing your child to the sun?</b>             |   |             |
| Yes                                                                                        | 1 |             |
| No                                                                                         | 0 |             |
| <b>7. Do you give your child fortified doses of vitamin D (oral drops)?</b>                |   |             |
| Yes                                                                                        | 1 |             |
| No                                                                                         | 0 |             |
| <b>8. Commit to giving my child a daily fortified dose of vitamin D</b>                    |   |             |
| Always*                                                                                    | 3 |             |
| Sometimes                                                                                  | 2 |             |
| Scarcely                                                                                   | 1 |             |
| Do not apply                                                                               | 0 |             |
| <b>9. What are the reasons for not giving your child the supportive dose of vitamin D?</b> |   |             |
| Forget                                                                                     | 0 |             |
| Child's illness                                                                            | 0 |             |
| Because I expose it to the sun, there is no need to take vitamin D doses*                  | 1 |             |
| Because the child gets a dose of vitamin D from formula or Cereal*                         | 1 |             |
| Mother's preoccupation with other children                                                 | 0 |             |
| Because the mother is busy with the job                                                    | 0 |             |
| Because vitamin D doses are not necessary                                                  | 0 |             |
| Other reasons (The child does not need vitamin D)                                          | 0 |             |
|                                                                                            |   | <b>0-28</b> |

#### 4. Vitamin D Attitudes questionnaire:

|                                                                 |   |  |
|-----------------------------------------------------------------|---|--|
| <b>1. Do you support taking vitamin D during pregnancy?</b>     |   |  |
| Yes                                                             | 1 |  |
| No                                                              | 0 |  |
| <b>2. Do you support taking vitamin D during breastfeeding?</b> |   |  |
| Yes                                                             | 1 |  |

|                                                                                     |   |             |
|-------------------------------------------------------------------------------------|---|-------------|
| No                                                                                  | 0 |             |
| <b>3. Do you support a blood test to detect the level of vitamin D in the body?</b> |   |             |
| Yes                                                                                 | 1 |             |
| No                                                                                  | 0 |             |
| <b>4. If the answer to the previous question is yes, do you suggest that it be?</b> |   |             |
| Periodically*                                                                       | 3 |             |
| From time to time                                                                   | 2 |             |
| At the request of the doctor                                                        | 1 |             |
| <b>5. Do you support giving your child vitamin D since birth?</b>                   |   |             |
| Yes                                                                                 | 1 |             |
| No                                                                                  | 0 |             |
| <b>6. Do you support exposing your child to the sun daily?</b>                      |   |             |
| Yes                                                                                 | 1 |             |
| No                                                                                  | 0 |             |
| <b>7. Do you support the use of sunscreen while exposing your child to the sun?</b> |   |             |
| Yes                                                                                 | 1 |             |
| No                                                                                  | 0 |             |
|                                                                                     |   | <b>0-12</b> |

## 5. Practices towards taking vitamin D and exposure to sunlight

|                                                                                        |   |  |
|----------------------------------------------------------------------------------------|---|--|
| <b>1. I am currently taking vitamin D supplements</b>                                  |   |  |
| Yes                                                                                    | 1 |  |
| No                                                                                     | 0 |  |
| <b>2. I took vitamin D supplements during my pregnancy</b>                             |   |  |
| Always                                                                                 | 3 |  |
| Sometimes                                                                              | 2 |  |
| Scarcely                                                                               | 1 |  |
| never                                                                                  | 0 |  |
| <b>3. I take vitamin D while breastfeeding</b>                                         |   |  |
| Always                                                                                 | 3 |  |
| Sometimes                                                                              | 2 |  |
| Scarcely                                                                               | 1 |  |
| never                                                                                  | 0 |  |
| <b>4. I was concerned that the food I prepared during the week contained vitamin D</b> |   |  |
| Always                                                                                 | 3 |  |
| Sometimes                                                                              | 2 |  |
| Scarcely                                                                               | 1 |  |
| Permanently                                                                            | 0 |  |
| <b>5. I exposed to the sun while out of the house</b>                                  |   |  |
| Yes                                                                                    | 1 |  |
| No                                                                                     | 0 |  |
| <b>6. I make sure that the food I eat during the week contains vitamin D</b>           |   |  |
| Yes                                                                                    | 2 |  |
| Sometimes                                                                              | 1 |  |
| No                                                                                     | 0 |  |
| <b>7. I make sure to be exposed to the sun daily</b>                                   |   |  |
| Yes                                                                                    | 1 |  |
| No                                                                                     | 0 |  |
| <b>8. How many hours per week are you exposed to the sun?</b>                          |   |  |
| less than an hour                                                                      | 0 |  |

|                                                                                    |   |             |
|------------------------------------------------------------------------------------|---|-------------|
| From one to two hours                                                              | 1 |             |
| 6 hours and more*                                                                  | 2 |             |
| <b>9. What parts of the body are exposed to the sun?</b>                           |   |             |
| Face                                                                               | 1 |             |
| Hands                                                                              | 1 |             |
| Face and hands                                                                     | 2 |             |
| Face, hands, and legs*                                                             | 3 |             |
| <b>10. What is the right time to be exposed to the sun?</b>                        |   |             |
| Before ten in the morning                                                          | 2 |             |
| From ten to three in the evening                                                   | 1 |             |
| After three o'clock in the evening                                                 | 1 |             |
| <b>11. Do you use sunscreen when you go out in the sun?</b>                        |   |             |
| Yes                                                                                | 1 |             |
| Sometimes                                                                          | 0 |             |
| No                                                                                 | 0 |             |
| <b>12. How often do you use sunscreen while out in the sun?</b>                    |   |             |
| Always                                                                             | 3 |             |
| Sometimes                                                                          | 2 |             |
| Scarcely                                                                           | 1 |             |
| Permanently                                                                        | 3 |             |
| <b>13. Is there a conflict between applying sunscreen and exposure to the sun?</b> |   |             |
| Yes                                                                                | 1 |             |
| No                                                                                 | 0 |             |
| I do not know                                                                      | 0 |             |
|                                                                                    |   | <b>0-26</b> |

The total score can be calculated by summing the points for each question. Higher scores indicate better practices towards vitamin D supplementation and sun exposure.
