# Supplementary material for: Vitamin D supplementation in Saudi Arabia: mothers’ knowledge, practices, and attitudes
Source: PeerJ. 2025 Aug 28;13:e19781. doi: 10.7717/peerj.19781 (PMC12399081; doi:10.7717/peerj.19781)
Supplement: Supplemental Information 3 [file peerj-13-19781-s003.xlsx]

## Sheet: Form Responses 1
											Item 1	Item 2	Item 3	Item 4	Item 5	Item 6	Item 7	Item 8	Item 9	Item 10	Item 11	Item 12	Item 13	Item 14	Item 15	Item 16	Item 17	Item 18	Item 19	Item 20	Item 21	Item 22	Item 23	Item 24	Item 25	Item 26	Item 27	Item 28	Item 29	Item 30	Item 31	Item 32	Item 33	Item 34	Item 35
Timestamp	Age	Marital	Educational	Functional	Nationality	Number _childeren	yongest	Living	income	feeding	Have you heard of Vitamin D?	What is the source you learned about vitamin D? (You can choose more than one answer)	Is there vitamin D in breast milk?	What are the benefits of Vit D?	What are the sources of Vit D?	Where is Vitamin D found in food? (You can choose more than one answer)	I expose my child to the sun daily	What part of the child's body exposed to the sun?	Do you expose your child to the sun?	What time do you expose your child to the sun?	What is the average number of hours your child is exposed to the sun per week?	Do you know the appropriate dose for exposing your child to the sun?	Do you give your child fortified doses of vitamin D (oral drops)?	Commit to giving my child a daily fortified dose of vitamin D	What are the reasons for not giving your child the supportive dose of vitamin D?	I took vitamin D supplements during my pregnancy	I take vitamin D while breastfeeding	Do you support a blood test to detect the level of vitamin D in the body?	If the answer to the previous question is yes, do you suggest that it be?	Do you support giving your child vitamin D since birth?	Do you support exposing your child to the sun daily?	Do you support the use of sunscreen while exposing your child to the sun?	I am currently taking vitamin D supplements	I took vitamin D supplements during my pregnancy	I take vitamin D while breastfeeding	I was concerned that the food I prepared during the week contained vitamin D	I exposed to the sun while out of the house	I make sure that the food I eat during the week contains vitamin D	I make sure to be exposed to the sun daily	How many hours per week are you exposed to the sun?	What parts of the body are exposed to the sun?	What is the right time to be exposed to the sun?	Do you use sunscreen when you go out in the sun?	How often do you use sunscreen while out in the sun?	Is there a conflict between applying sunscreen and exposure to the sun?
2022-08-10 20:08:28	32	Married	Master and above	Employee	Saudi	Two children	1	Owing house	More than 20 thousand riyals per month	Both	Yes	Social media (Snapchat, Instagram, Facebook...), Doctor/Nurse	I don't know	Bone health, Prevents arthritis, Prevents depression, Important for child health and growth	Sun	I don't know	No	I do not expose my child to the sun	Indirectly (Behind the glass, for example)	I do not expose my child to the sun	I do not expose my child to the sun	No	Yes	Always	Other reasons (The child does not need vitamin D)	Yes	Yes	Yes	From time to time	Yes	Yes	Yes	No	Sometimes	never	Permanently	Yes	No	No	6 hours and more	Face and hands	Before ten in the morning	No	Scarcely	No
2022-09-24 15:35:24	25	Married	High school	Unemployed	Saudi	Three kids	1	Rented house	From 5 - less than 10000 riyals per month	Both	Yes	Friends – family	I don't know	Bone health, Boosts immunity, Important for child health and growth	Sun, Food, Food supplements	Fruits	Yes	Feet and legs	Directly	Before ten in the morning	From one to two hours	Yes	No	Do not apply	Because I expose it to the sun, there is no need to take vitamin D doses	Yes	Yes	Yes	From time to time	Yes	Yes	No	No	Sometimes	never	Permanently	Yes	Yes	Yes	From one to two hours	Face, hands, and legs	Before ten in the morning	No	Scarcely	No
2022-09-13 22:25:48	27	Married	High school	Unemployed	Saudi	Two children	1	Owing house	From 5 - less than 10000 riyals per month	Both	Yes	Social media (Snapchat, Instagram, Facebook...), Friends – family, Doctor/Nurse	Yes	Bone health, Boosts immunity, Prevents arthritis, Prevents depression, Important for hair health, Important for skin health, Important for child health and growth	Sun	Fruits, Vegetables	No	I do not expose my child to the sun	Indirectly (Behind the glass, for example)	Before ten in the morning	I do not expose my child to the sun	No	Yes	Always	Other reasons (The child does not need vitamin D)	Yes	Yes	Yes	Periodically	Yes	Yes	Yes	No	Sometimes	never	Permanently	Yes	No	No	less than an hour	Face and hands	Before ten in the morning	No	Never use sunscreen	I do not know
2022-09-24 14:55:33	30	Married	High school	Unemployed	Saudi	Four children and more	1	Rented house	From 5 - less than 10000 riyals per month	Both	Yes	Social media (Snapchat, Instagram, Facebook...)	Yes	Bone health, Boosts immunity, Important for child health and growth	Sun, Food supplements	Milk and dairy products, Fruits, Vegetables, Yolk	Yes	All the body	Directly	Before ten in the morning	Less than an hour	Yes	Yes	Always	Other reasons (The child does not need vitamin D)	No	Yes	Yes	Periodically	Yes	Yes	No	Yes	Sometimes	Always	Scarcely	No	Yes	Yes	less than an hour	Face, hands, and legs	Before ten in the morning	Yes	Always	No
2022-09-12 19:28:52	31	Married	Bachelor	Unemployed	Non-Saudi	Two children	1	Rented house	More than 20 thousand riyals per month	Breast feeding	Yes	Doctor/Nurse	Yes	Bone health, Important for hair health, Important for child health and growth	Sun	Milk and dairy products, Fish, Yolk	No	Face only	Indirectly (Behind the glass, for example)	Between 10 in the morning and 3 in the afternoon	Less than an hour	No	Yes	Sometimes	Forget, Mother's preoccupation with other children	Yes	Yes	Yes	From time to time	Yes	No	Yes	No	Sometimes	Scarcely	Permanently	Yes	Sometimes	No	less than an hour	Face and hands	Before ten in the morning	Sometimes	Scarcely	No
2022-08-02 21:46:40	33	Married	Bachelor	Unemployed	Saudi	Two children	1	Rented house	From 10-20 thousand riyals per month	Both	Yes	Social media (Snapchat, Instagram, Facebook...), Friends – family	I don't know	Bone health, Boosts immunity, Helps healthy pregnancy, Prevents depression, Important for hair health, Prevents obesity and weight gain, Important for child health and growth	Sun	Milk and dairy products, Yolk	No	I do not expose my child to the sun	Indirectly (Behind the glass, for example)	I do not expose my child to the sun	I do not expose my child to the sun	No	Yes	Always	Other reasons (The child does not need vitamin D)	Yes	Yes	Yes	From time to time	Yes	Yes	No	Yes	Sometimes	Always	Sometimes	Yes	Sometimes	No	less than an hour	Face and hands	After three o'clock in the evening	No	Scarcely	I do not know
2022-09-24 17:21:17	44	Married	High school	Unemployed	Saudi	Four children and more	1	Owing house	Less than 5,000 riyals per month	Breast feeding	Yes	TV, radio, advertisements, Social media (Snapchat, Instagram, Facebook...)	I don't know	Bone health, Boosts immunity, Helps healthy pregnancy, Prevents stroke, Prevents arthritis, Prevents depression, Important for hair health, Prevents obesity and weight gain, Important for skin health, Important for child health and growth	Sun, Food supplements	Milk and dairy products, Fruits, Vegetables, Fish, Yolk, Liver	Yes	All the body		Before ten in the morning	Less than an hour	No	No	Do not apply	Because I expose it to the sun, there is no need to take vitamin D doses, Because the child gets a dose of vitamin D from formula or Cereal, Mother's preoccupation with other children	No	No	No	Periodically	No	Yes	Yes	No	never	never	Permanently	Yes	Yes	Yes	less than an hour	Face, hands, and legs	After three o'clock in the evening	No	Never use sunscreen	No
2022-09-24 15:42:05	27	Married	High school	Unemployed	Saudi	Two children	2	Rented house	From 5 - less than 10000 riyals per month	Bottle feeding	Yes	Friends – family, Doctor/Nurse	Yes	Bone health, Boosts immunity, Important for hair health, Important for skin health, Important for child health and growth	Sun, Food supplements	Milk and dairy products, Fruits, Yolk, لا أعرف	No	All the body	Directly	Before ten in the morning	Less than an hour	No	No	Do not apply	Because the child gets a dose of vitamin D from formula or Cereal	No	No	Yes	From time to time	No	Yes	Yes	No	never	never	Sometimes	Yes	Yes	No	From one to two hours	Face, hands, and legs	Before ten in the morning	Yes	Always	No
2022-08-03 00:08:49	30	Married	Bachelor	Employee	Saudi	One child	2	Owing house	More than 20 thousand riyals per month	Both	Yes	Social media (Snapchat, Instagram, Facebook...), Doctor/Nurse	No	Bone health, Prevents arthritis	Sun	I don't know	No	All the body	Indirectly (Behind the glass, for example)	Before ten in the morning	Less than an hour	No	Yes	Always	Other reasons (The child does not need vitamin D)	Yes	Yes	Yes	From time to time	Yes	No	No	Yes	Sometimes	Sometimes	Permanently	No	No	No	less than an hour	Face and hands	Before ten in the morning	No	Never use sunscreen	I do not know
2022-08-02 23:03:51	33	Married	Master and above	Employee	Saudi	One child	2	Owing house	More than 20 thousand riyals per month	Both	Yes	Social media (Snapchat, Instagram, Facebook...), Friends – family, Magazines, Books, Doctor/Nurse	Yes	Bone health, Boosts immunity, Prevents depression, Important for hair health, Important for child health and growth	Sun	I don't know	No	I do not expose my child to the sun	Indirectly (Behind the glass, for example)	I do not expose my child to the sun	I do not expose my child to the sun	Yes	Yes	Always	Other reasons (The child does not need vitamin D)	Yes	Yes	Yes	Periodically	Yes	Yes	Yes	Yes	Sometimes	Always	Permanently	No	No	No	less than an hour	Face and hands	After three o'clock in the evening	No	Scarcely	No
2022-09-13 07:53:19	33	Married	Bachelor	Unemployed	Non-Saudi	Three kids	2	Owing house	Less than 5,000 riyals per month	Breast feeding	Yes	Social media (Snapchat, Instagram, Facebook...), Doctor/Nurse	No	Bone health, Boosts immunity, Important for child health and growth	Sun	Milk and dairy products, Fish, Liver	Yes	All the body	Directly	Before ten in the morning	6 hours and more	No	Yes	Always	Other reasons (The child does not need vitamin D)	Yes	Yes	Yes	Periodically	Yes	Yes	Yes	Yes	Always	never	Sometimes	Yes	Yes	Yes	From one to two hours	Face and hands	Before ten in the morning	Yes	Always	No
2022-08-03 01:37:58	35	Married	Bachelor	Unemployed	Saudi	Three kids	2	Owing house	From 5 - less than 10000 riyals per month	Bottle feeding	Yes	Social media (Snapchat, Instagram, Facebook...)	No	Bone health, Boosts immunity, Prevents depression, Important for skin health, Important for child health and growth	Sun	Milk and dairy products, Fish, Yolk	No	I do not expose my child to the sun	Indirectly (Behind the glass, for example)	I do not expose my child to the sun	I do not expose my child to the sun	No	Yes	Scarcely	Forget	No	No	Yes	Periodically	Yes	Yes	No	Yes	Scarcely	never	Scarcely	Yes	Yes	No	less than an hour	Face, hands, and legs	From ten to three in the evening	No	Never use sunscreen	Yes
2022-09-26 09:51:08	36	Married	Master and above	Employee	Saudi	Four children and more	2	Owing house	From 10-20 thousand riyals per month	Breast feeding	Yes	TV, radio, advertisements, Friends – family, Magazines, Books	I don't know	Bone health, Helps healthy pregnancy, Prevents arthritis, Important for child health and growth	Sun, Food, Food supplements	Milk and dairy products	Yes	All the body	Directly	After three in the afternoon	From one to two hours	No	Yes	Always	Because I expose it to the sun, there is no need to take vitamin D doses, Because the child gets a dose of vitamin D from formula or Cereal	Yes	Yes	Yes	Periodically	Yes	Yes	Yes	Yes	Sometimes	Always	Sometimes	Yes	Yes	No	less than an hour	Face and hands	After three o'clock in the evening	No	Never use sunscreen	No
2022-09-13 21:52:55	40	Married	Bachelor	Employee	Saudi	Three kids	2	Owing house	From 5 - less than 10000 riyals per month	Both	Yes	Friends – family	Yes	Bone health, Boosts immunity, Prevents arthritis, Important for hair health, Important for skin health, Important for child health and growth	Food supplements	Fish, Liver	No	All the body	Indirectly (Behind the glass, for example)	Before ten in the morning	Less than an hour	Yes	Yes	Sometimes	Because the mother is busy with the job	Yes	Yes	Yes	Periodically	Yes	Yes	No	No	never	Sometimes	Sometimes	Yes	Yes	No	less than an hour	Face and hands	Before ten in the morning	No	Scarcely	No
2022-09-11 19:39:49	30	Married	Bachelor	Unemployed	Saudi	Four children and more	3	Owing house	Less than 5,000 riyals per month	Bottle feeding	Yes	Doctor/Nurse	Yes	Important for child health and growth	Sun	Fish, Yolk, Liver	No	Hands only	Indirectly (Behind the glass, for example)	Other times	Less than an hour	No	Yes	Sometimes	Other reasons (The child does not need vitamin D)	Yes	Yes	Yes	Periodically	Yes	Yes	No	Yes	Sometimes	Sometimes	Permanently	Yes	Yes	No	less than an hour	Face and hands	After three o'clock in the evening	Sometimes	Sometimes	I do not know
2022-09-12 12:45:40	31	Married	Bachelor	Unemployed	Non-Saudi	Three kids	3	Rented house	From 10-20 thousand riyals per month	Breast feeding	Yes	TV, radio, advertisements, From studying at school/university, Doctor/Nurse	No	Bone health, Boosts immunity, Prevents arthritis, Prevents depression, Important for child health and growth	Food	Milk and dairy products, Vegetables	No	I do not expose my child to the sun	Indirectly (Behind the glass, for example)	I do not expose my child to the sun	I do not expose my child to the sun	No	Yes	Always	Other reasons (The child does not need vitamin D)	Yes	Yes	Yes	From time to time	Yes	Yes	No	No	Always	Sometimes	Permanently	No	Sometimes	No	less than an hour	Face only	Before ten in the morning	Yes	Always	I do not know
2022-08-11 19:33:41	32	Married	Bachelor	Unemployed	Saudi	One child	3	Owing house	From 10-20 thousand riyals per month	Both	Yes	TV, radio, advertisements, Social media (Snapchat, Instagram, Facebook...), Friends – family, From studying at school/university, Doctor/Nurse	Yes	Bone health, Prevents depression, Prevents obesity and weight gain, Important for skin health, Important for child health and growth	Sun	Fish, Yolk, Liver	No	All the body	Directly	Before ten in the morning	Less than an hour	No	Yes	Always	Other reasons (The child does not need vitamin D)	Yes	Yes	Yes	From time to time	Yes	Yes	No	No	Sometimes	never	Permanently	Yes	No	No	From one to two hours	Face, hands, and legs	Before ten in the morning	No	Scarcely	No
2022-09-12 15:00:46	37	Married	High school	Unemployed	Non-Saudi	Four children and more	3	Rented house	Less than 5,000 riyals per month	Breast feeding	Yes	Social media (Snapchat, Instagram, Facebook...), Friends – family, Doctor/Nurse	No	Bone health, Boosts immunity, Helps healthy pregnancy, Prevents diabetes, Prevents arthritis, Important for child health and growth	Sun	Milk and dairy products, Fish, Yolk, Liver	No	All the body	Directly	Other times	From one to two hours	No	No	Scarcely	Because I expose it to the sun, there is no need to take vitamin D doses, Because the child gets a dose of vitamin D from formula or Cereal	Yes	Yes	Yes	From time to time	Yes	Yes	No	No	never	Scarcely	Permanently	Yes	No	No	From one to two hours	Face and hands	Before ten in the morning	Sometimes	Scarcely	No
2022-08-18 19:33:54	40	Married	Bachelor	Unemployed	Saudi	Four children and more	3	Owing house	From 5 - less than 10000 riyals per month	Both	Yes	TV, radio, advertisements, Magazines, Books, From studying at school/university, Doctor/Nurse	No	Bone health, Boosts immunity, Helps healthy pregnancy, Prevents depression, Important for child health and growth	Sun	Fruits, Vegetables, Fish, Yolk, Liver	No	All the body	Directly	Before ten in the morning	From one to two hours	Yes	No	Do not apply	Because I expose it to the sun, there is no need to take vitamin D doses	No	Yes	Yes	From time to time	No	Yes	No	No	Sometimes	Sometimes	Permanently	No	Yes	No	less than an hour	Face, hands, and legs	Before ten in the morning	No	Never use sunscreen	No
2022-09-17 23:34:13	22	Married	Bachelor	Employee	Saudi	One child	4	Rented house	From 5 - less than 10000 riyals per month	Breast feeding	Yes	Friends – family, Magazines, Books, From studying at school/university, Doctor/Nurse	Yes	Bone health, Boosts immunity, Helps healthy pregnancy, Prevents stroke, Prevents diabetes, Prevents high blood pressure, Prevents arthritis, Prevents depression, Important for hair health, Prevents obesity and weight gain, Important for skin health, Important for child health and growth	Sun, Food, Food supplements	Milk and dairy products, Fruits, Vegetables, Fish, Yolk, Liver	Yes	Feet and legs	Directly	Before ten in the morning	Less than an hour	Yes	Yes	Sometimes	Child's illness, Because I expose it to the sun, there is no need to take vitamin D doses	Yes	Yes	Yes	From time to time	Yes	Yes	Yes	Yes	Always	Always	Sometimes	Yes	Yes	Yes	less than an hour	Face and hands	From ten to three in the evening	No	Always	No
2022-09-13 06:09:23	23	Married	Bachelor	Unemployed	Non-Saudi	One child	4	Rented house	More than 20 thousand riyals per month	Breast feeding	Yes	Friends – family	Yes	Bone health	Sun	I don't know	Yes	All the body	Indirectly (Behind the glass, for example)	After three in the afternoon	From one to two hours	No	Yes	Always	Other reasons (The child does not need vitamin D)	Yes	Yes	Yes	At the request of the doctor	Yes	Yes	No	Yes	Sometimes	Sometimes	Sometimes	Yes	Yes	No	From one to two hours	Face and hands	Before ten in the morning	Yes	Sometimes	No
2022-09-19 18:50:01	25	Married	Bachelor	Employee	Saudi	Two children	4	Rented house	From 10-20 thousand riyals per month	Breast feeding	Yes	From studying at school/university	Yes	Bone health, Boosts immunity, Helps healthy pregnancy, Prevents arthritis, Prevents obesity and weight gain, Important for child health and growth	Sun, Food, Food supplements	Milk and dairy products, Fish, Yolk, Liver	Yes	All the body	Indirectly (Behind the glass, for example)	Before ten in the morning	From one to two hours	Yes	No	Do not apply	Because I expose it to the sun, there is no need to take vitamin D doses	Yes	No	Yes	From time to time	Yes	Yes	No	No	never	Sometimes	Sometimes	Yes	Yes	Yes	From one to two hours	Face, hands, and legs	From ten to three in the evening	No	Never use sunscreen	Yes
2022-07-31 20:35:09	29	Married	Bachelor	Unemployed	Saudi	Three kids	4	Rented house	From 10-20 thousand riyals per month	Bottle feeding	Yes	Friends – family	I don't know	Bone health	Sun	I don't know	No	I do not expose my child to the sun	Indirectly (Behind the glass, for example)	I do not expose my child to the sun	I do not expose my child to the sun	No	No	Scarcely	Forget, Mother's preoccupation with other children	No	Yes	Yes	From time to time	Yes	Yes	No	No	never	never	Always	Yes	No	No	From one to two hours	Face and hands	After three o'clock in the evening	No	Never use sunscreen	No
2022-09-11 20:33:07	30	Married	Bachelor	Unemployed	Saudi	Two children	4	Owing house	From 5 - less than 10000 riyals per month	Both	Yes	Doctor/Nurse	Yes	Bone health, Boosts immunity, Important for child health and growth	Sun	Milk and dairy products, Fruits, Vegetables, Fish	Yes	All the body	Indirectly (Behind the glass, for example)	Between 10 in the morning and 3 in the afternoon	Less than an hour	Yes	Yes	Sometimes	Forget, Mother's preoccupation with other children	Yes	Yes	Yes	Periodically	Yes	Yes	Yes	No	Scarcely	Scarcely	Permanently	Yes	Yes	Yes	less than an hour	Face, hands, and legs	From ten to three in the evening	Yes	Sometimes	No
2022-09-19 18:42:19	30	Married	High school	Employee	Saudi	One child	4	Owing house	From 5 - less than 10000 riyals per month	Both	Yes	Social media (Snapchat, Instagram, Facebook...)	Yes	Bone health	Sun	Milk and dairy products, Fruits, Fish, Yolk	Yes	All the body	Indirectly (Behind the glass, for example)	Between 10 in the morning and 3 in the afternoon	6 hours and more	No	No	Do not apply	Because I expose it to the sun, there is no need to take vitamin D doses, Because vitamin D doses are not necessary	Yes	Yes	Yes	At the request of the doctor	Yes	Yes	Yes	No	Sometimes	Sometimes	Sometimes	Yes	Yes	Yes	From one to two hours	Face, hands, and legs	From ten to three in the evening	Yes	Always	I do not know
2022-09-11 13:44:57	38	Married	High school	Unemployed	Saudi	Three kids	4	Owing house	From 5 - less than 10000 riyals per month	Bottle feeding	Yes	Social media (Snapchat, Instagram, Facebook...), Doctor/Nurse	Yes	Bone health, Important for child health and growth	Sun	Milk and dairy products, Fish	Yes	All the body	Indirectly (Behind the glass, for example)	Before ten in the morning	Less than an hour	Yes	Yes	Always	Other reasons (The child does not need vitamin D)	Yes	Yes	Yes	Periodically	Yes	Yes	Yes	Yes	Always	Always	Sometimes	Yes	Yes	Yes	less than an hour	Face, hands, and legs	Before ten in the morning	Yes	Always	No
2022-08-11 00:21:42	45	Married	Bachelor	Unemployed	Saudi	Four children and more	4	Owing house	From 10-20 thousand riyals per month	Both	Yes	Doctor/Nurse	Yes	Bone health, Prevents depression, Important for child health and growth	Sun	Milk and dairy products	Yes	All the body	Directly	Before ten in the morning	From one to two hours	No	Yes	Sometimes	Forget	No	Yes	Yes	From time to time	Yes	Yes	No	No	Sometimes	Sometimes	Permanently	Yes	Yes	No	From one to two hours	Face, hands, and legs	Before ten in the morning	No	Never use sunscreen	No
2022-09-13 12:46:11	35	Married	High school	Unemployed	Non-Saudi	Three kids	5	Owing house	From 5 - less than 10000 riyals per month	Bottle feeding	Yes	Social media (Snapchat, Instagram, Facebook...), Friends – family	Yes	Bone health	Sun	Vegetables	No	I do not expose my child to the sun	Indirectly (Behind the glass, for example)	I do not expose my child to the sun	From one to two hours	Yes	No	Do not apply	Other reasons (The child does not need vitamin D)	Yes	Yes	Yes	From time to time	Yes	Yes	No	No	never	never	Permanently	Yes	Yes	Yes	From one to two hours	Face, hands, and legs	Before ten in the morning	No	Never use sunscreen	No
2022-09-11 21:57:26	36	Married	Master and above	Employee	Non-Saudi	Two children	5	Rented house	From 5 - less than 10000 riyals per month	Breast feeding	Yes	TV, radio, advertisements, Social media (Snapchat, Instagram, Facebook...)	Yes	Bone health, Boosts immunity, Helps healthy pregnancy, Prevents arthritis, Important for hair health, Important for child health and growth	Sun	Milk and dairy products, Fish, Yolk	No	Hands only	Directly	Before ten in the morning	From one to two hours	No	No	Do not apply	Forget, Because the child gets a dose of vitamin D from formula or Cereal	Yes	Yes	Yes	Periodically	No	Yes	Yes	No	Scarcely	never	Sometimes	Yes	Yes	Yes	From one to two hours	Face and hands	Before ten in the morning	Yes	Always	No
2022-09-11 19:40:38	39	Married	High school	Unemployed	Saudi	Four children and more	5	Owing house	From 10-20 thousand riyals per month	Both	Yes	Doctor/Nurse	Yes	Important for child health and growth	Sun	Milk and dairy products, Fish	Yes	Feet and legs	Directly	Before ten in the morning	Less than an hour	No	No	Do not apply	Because I expose it to the sun, there is no need to take vitamin D doses	Yes	Yes	Yes	From time to time	No	Yes	No	Yes	Sometimes	Sometimes	Sometimes	Yes	Yes	Yes	less than an hour	Face, hands, and legs	Before ten in the morning	Sometimes	Sometimes	No
2022-07-31 14:28:46	33	Married	Bachelor	Unemployed	Saudi	Four children and more	6	Owing house	From 5 - less than 10000 riyals per month	Both	Yes	Social media (Snapchat, Instagram, Facebook...), Friends – family	I don't know	Bone health, Prevents arthritis, Important for hair health, Important for child health and growth	Sun	Milk and dairy products, Fish, Yolk	No	All the body	Directly	Before ten in the morning	Less than an hour	No	Yes	Sometimes	Forget, Mother's preoccupation with other children	Yes	Yes	Yes	Periodically	Yes	Yes	No	No	Sometimes	Sometimes	Sometimes	Yes	Sometimes	No	From one to two hours	Face and hands	Before ten in the morning	No	Sometimes	I do not know
2022-09-14 11:52:43	34	Married	Master and above	Employee	Saudi	Two children	6	Owing house	From 10-20 thousand riyals per month	Both	Yes	Friends – family, Magazines, Books, From studying at school/university, Doctor/Nurse	Yes	Bone health, Boosts immunity, Prevents depression, Important for skin health, Important for child health and growth	Sun	Milk and dairy products, Fruits, Vegetables, Fish, Yolk, Liver	No	I do not expose my child to the sun	Indirectly (Behind the glass, for example)	Other times	Less than an hour	No	Yes	Sometimes	Forget,Other reasons (The child does not need vitamin D)	No	No	Yes	From time to time	Yes	Yes	No	Yes	Always	Sometimes	Sometimes	No	No	No	less than an hour	Face and hands	Before ten in the morning	No	Sometimes	No
2022-08-01 01:06:46	37	Married	High school	Unemployed	Saudi	Four children and more	6	Owing house	From 10-20 thousand riyals per month	Bottle feeding	Yes	Social media (Snapchat, Instagram, Facebook...), Friends – family, Doctor/Nurse	I don't know	I don't know	I don't know	I don't know	No	All the body	Directly	Before ten in the morning	From one to two hours	No	No	Do not apply	Because vitamin D doses are not necessary,Other reasons (The child does not need vitamin D)	Yes	Yes	Yes	Periodically	Yes	Yes	Yes	Yes	Sometimes	Always	Scarcely	Yes	Yes	Yes	From one to two hours	Face, hands, and legs	Before ten in the morning	Yes	Always	No
2022-08-11 14:58:12	37	Married	Master and above	Employee	Saudi	Four children and more	6	Owing house	More than 20 thousand riyals per month	Both	Yes	TV, radio, advertisements, Social media (Snapchat, Instagram, Facebook...), Friends – family, Magazines, Books, From studying at school/university, Doctor/Nurse	Yes	Bone health, Boosts immunity, Helps healthy pregnancy, Prevents depression, Important for hair health, Prevents obesity and weight gain, Important for skin health, Important for child health and growth	Sun	Milk and dairy products, Fruits, Vegetables, Fish, Yolk, Liver	Yes	Feet and legs	Indirectly (Behind the glass, for example)	Before ten in the morning	Less than an hour	No	Yes	Sometimes	Forget, Mother's preoccupation with other children	Yes	No	Yes	Periodically	Yes	Yes	No	Yes	Sometimes	Sometimes	Permanently	Yes	Yes	Yes	less than an hour	Face, hands, and legs	Before ten in the morning	No	Scarcely	No
2022-09-13 17:02:32	38	Married	High school	Unemployed	Non-Saudi	Three kids	6	Rented house	Less than 5,000 riyals per month	Breast feeding	No	Friends – family	Yes	Bone health, Boosts immunity, Important for child health and growth	Sun	Milk and dairy products, لا أعرف	No	Face only	Indirectly (Behind the glass, for example)	Between 10 in the morning and 3 in the afternoon	Less than an hour	No	No	Do not apply	Because the child gets a dose of vitamin D from formula or Cereal	Yes	Yes	Yes	At the request of the doctor	No	Yes	Yes	No	never	never	Scarcely	Yes	Sometimes	No	less than an hour	Face and hands	From ten to three in the evening	Sometimes	Sometimes	I do not know
2022-08-03 01:51:10	42	Married	Master and above	Employee	Saudi	Three kids	6	Owing house	More than 20 thousand riyals per month	Both	Yes	Doctor/Nurse	I don't know	Important for child health and growth	Sun	I don't know	No	I do not expose my child to the sun	Indirectly (Behind the glass, for example)	I do not expose my child to the sun	I do not expose my child to the sun	No	Yes	Always	Other reasons (The child does not need vitamin D)	Yes	Yes	Yes	At the request of the doctor	Yes	Yes	Yes	Yes	Sometimes	Always	Permanently	Yes	Sometimes	No	6 hours and more	Face and hands	Before ten in the morning	No	Never use sunscreen	No
2022-09-03 02:39:27	29	Married	Bachelor	Unemployed	Saudi	One child	7	Rented house	From 10-20 thousand riyals per month	Both	Yes	Social media (Snapchat, Instagram, Facebook...)	I don't know	Bone health, Boosts immunity	Sun	Fruits	Yes	All the body	Indirectly (Behind the glass, for example)	Between 10 in the morning and 3 in the afternoon	From one to two hours	No	Yes	Always	Because I expose it to the sun, there is no need to take vitamin D doses, Because the child gets a dose of vitamin D from formula or Cereal	Yes	Yes	Yes	From time to time	Yes	Yes	No	No	Sometimes	Sometimes	Scarcely	No	Sometimes	No	less than an hour	Face and hands	From ten to three in the evening	Yes	Always	I do not know
2022-08-19 02:05:34	33	Married	Bachelor	Unemployed	Saudi	Four children and more	7	Rented house	From 10-20 thousand riyals per month	Bottle feeding	Yes	Social media (Snapchat, Instagram, Facebook...)	Yes	Bone health, Boosts immunity, Important for child health and growth	Food supplements	Fish, Yolk, Liver	No	I do not expose my child to the sun	Indirectly (Behind the glass, for example)	I do not expose my child to the sun	I do not expose my child to the sun	No	Yes	Sometimes	Forget	Yes	No	Yes	From time to time	No	No	No	No	Sometimes	never	Sometimes	Yes	No	No	less than an hour	Face and hands	After three o'clock in the evening	No	Never use sunscreen	No
2022-08-03 01:20:37	35	Married	Bachelor	Employee	Saudi	Two children	7	Owing house	More than 20 thousand riyals per month	Bottle feeding	Yes	Doctor/Nurse	I don't know	Important for child health and growth	Sun	Vegetables	No	I do not expose my child to the sun	Indirectly (Behind the glass, for example)	I do not expose my child to the sun	I do not expose my child to the sun	Yes	Yes	Sometimes	Forget	Yes	Yes	No	Periodically	Yes	Yes	No	No	Scarcely	Sometimes	Scarcely	Yes	No	No	From one to two hours	Face and hands	From ten to three in the evening	Yes	Sometimes	No
2022-09-17 23:45:10	39	Married	Bachelor	Employee	Saudi	Two children	7	Rented house	From 10-20 thousand riyals per month	Both	Yes	TV, radio, advertisements, Social media (Snapchat, Instagram, Facebook...), Friends – family, Magazines, Books, From studying at school/university, Doctor/Nurse	I don't know	Bone health, Boosts immunity, Helps healthy pregnancy, Prevents stroke, Prevents diabetes, Prevents high blood pressure, Prevents arthritis, Prevents depression, Important for hair health, Prevents obesity and weight gain, Important for skin health, Important for child health and growth	Sun, Food, Food supplements	Milk and dairy products, Fruits, Vegetables, Fish, Yolk, Liver	No	Feet and legs	Directly	Other times	Less than an hour	Yes	No	Do not apply	Because I expose it to the sun, there is no need to take vitamin D doses	No	No	No		No	Yes	No	No	never	never	Permanently	Yes	Sometimes	No	less than an hour	Face and hands	Before ten in the morning	No	Never use sunscreen	No
2022-08-02 21:24:56	40	Married	Bachelor	Employee	Saudi	Three kids	7	Owing house	More than 20 thousand riyals per month	Both	Yes	Social media (Snapchat, Instagram, Facebook...), Friends – family, From studying at school/university, Doctor/Nurse	No	Bone health, Boosts immunity, Prevents arthritis, Prevents depression, Important for hair health, Prevents obesity and weight gain, Important for skin health, Important for child health and growth	Sun	Milk and dairy products, Vegetables, Fish	Yes	All the body	Directly	Between 10 in the morning and 3 in the afternoon	6 hours and more	No	No	Do not apply	Other reasons (The child does not need vitamin D), لأنه ليس لديه نقص فيتامين د بتحليل الدم اتضح لي ذلك	Yes	Yes	Yes	Periodically	Yes	Yes	Yes	Yes	Sometimes	Always	Permanently	Yes	Yes	Yes	From one to two hours	Face, hands, and legs	From ten to three in the evening	Yes	Always	No
2022-08-10 19:08:46	40	Married	Bachelor	Employee	Saudi	Four children and more	7	Owing house	From 5 - less than 10000 riyals per month	Bottle feeding	Yes	Social media (Snapchat, Instagram, Facebook...), Friends – family, Magazines, Books, Doctor/Nurse	Yes	Bone health, Boosts immunity, Important for child health and growth	Sun	Milk and dairy products, Vegetables	Yes	All the body	Indirectly (Behind the glass, for example)	Before ten in the morning	Less than an hour	No	Yes	Sometimes	Forget	No	Yes	Yes	From time to time	No	Yes	Yes	No	never	Sometimes	Permanently	Yes	Sometimes	Yes	From one to two hours	Face, hands, and legs	Before ten in the morning	Yes	Always	No
2022-08-18 15:37:35	45	Married	Secondary	Unemployed	Saudi	Four children and more	7	Owing house	From 5 - less than 10000 riyals per month	Both	Yes	Social media (Snapchat, Instagram, Facebook...), Magazines, Books	Yes	I don't know	Sun	Fruits, Vegetables, Fish	Yes	All the body	Indirectly (Behind the glass, for example)	Before ten in the morning	From one to two hours	No	No	Sometimes	Because I expose it to the sun, there is no need to take vitamin D doses	No	No	Yes	From time to time	Yes	Yes	No	No	never	never	Always	Yes	Yes	No	From one to two hours	Face, hands, and legs	After three o'clock in the evening	No	Never use sunscreen	I do not know
2022-09-14 12:41:56	27	Married	Master and above	Employee	Saudi	One child	8	Owing house	From 10-20 thousand riyals per month	Bottle feeding	Yes	Friends – family	Yes	Bone health, Boosts immunity, Helps healthy pregnancy, Prevents arthritis, Prevents depression, Important for hair health, Important for skin health, Important for child health and growth	Food	Milk and dairy products	Yes	All the body	Directly	Before ten in the morning	From one to two hours	Yes	Yes	Always	Forget, Because the mother is busy with the job	Yes	Yes	Yes	Periodically	Yes	Yes	Yes	Yes	Sometimes	Always	Always	Yes	Yes	Yes	From one to two hours	Face, hands, and legs	Before ten in the morning	Yes	Always	Yes
2022-07-31 00:27:37	29	Married	Bachelor	Unemployed	Saudi	Two children	8	Owing house	More than 20 thousand riyals per month	Bottle feeding	Yes	Doctor/Nurse	I don't know	Important for child health and growth	Food supplements	Milk and dairy products, Fruits	No	I do not expose my child to the sun	Indirectly (Behind the glass, for example)	I do not expose my child to the sun	I do not expose my child to the sun	No	Yes	Always	Because the child gets a dose of vitamin D from formula or Cereal	Yes	Yes	Yes	From time to time	Yes	Yes	No	Yes	Sometimes	Always	Permanently	Yes	Sometimes	No	less than an hour	Face and hands	From ten to three in the evening	No	Never use sunscreen	I do not know
2022-09-19 17:38:26	32	Married	Bachelor	Employee	Saudi	Three kids	8	Rented house	More than 20 thousand riyals per month	Bottle feeding	Yes	Doctor/Nurse	I don't know	Bone health, Important for child health and growth	Sun	Milk and dairy products, Fish	Yes	All the body	Indirectly (Behind the glass, for example)	After three in the afternoon	Less than an hour	No	Yes	Sometimes	Forget	Yes	Yes	Yes	Periodically	Yes	Yes	No	Yes	Always	Sometimes	Sometimes	Yes	Yes	No	From one to two hours	Face and hands	After three o'clock in the evening	Yes	Always	No
2022-09-20 21:15:15	35	Married	Bachelor	Unemployed	Saudi	Three kids	8	Owing house	More than 20 thousand riyals per month	Bottle feeding	Yes	Social media (Snapchat, Instagram, Facebook...), Friends – family, From studying at school/university, Doctor/Nurse	I don't know	Bone health, Prevents arthritis, Prevents depression, Important for hair health, Prevents obesity and weight gain, Important for child health and growth	Sun, Food, Food supplements	Fruits, Fish, Yolk	No	I do not expose my child to the sun	Indirectly (Behind the glass, for example)	I do not expose my child to the sun	I do not expose my child to the sun	No	Yes	Sometimes	Forget	Yes	Yes	Yes	From time to time	Yes	Yes	No	No	Always	never	Permanently	Yes	Sometimes	No	less than an hour	Face only	Before ten in the morning	Sometimes	Scarcely	I do not know
2022-08-18 21:33:38	36	Married	Bachelor	Employee	Saudi	Three kids	8	Owing house	More than 20 thousand riyals per month	Breast feeding	Yes	Social media (Snapchat, Instagram, Facebook...)	Yes	Bone health, Boosts immunity, Helps healthy pregnancy, Prevents stroke, Prevents diabetes, Prevents high blood pressure, Prevents arthritis, Prevents depression, Important for hair health, Prevents obesity and weight gain, Important for skin health, Important for child health and growth	Sun	Milk and dairy products, Fruits, Yolk	No	I do not expose my child to the sun	Indirectly (Behind the glass, for example)	After three in the afternoon	I do not expose my child to the sun	No	Yes	Scarcely	Because the mother is busy with the job	No	No	Yes	From time to time	Yes	No	Yes	No	Sometimes	Always	Permanently	No	Yes	No	From one to two hours	Face only	After three o'clock in the evening	No	Scarcely	Yes
2022-07-31 00:17:04	38	Married	Bachelor	Employee	Saudi	Four children and more	8	Owing house	More than 20 thousand riyals per month	Bottle feeding	Yes	Social media (Snapchat, Instagram, Facebook...), Friends – family	Yes	Bone health	Sun	Yolk	No	I do not expose my child to the sun	Indirectly (Behind the glass, for example)	I do not expose my child to the sun	I do not expose my child to the sun	No	Yes	Sometimes	Forget	Yes	Yes	Yes	From time to time	Yes	No	No	No	Sometimes	never	Permanently	Yes	No	No	From one to two hours	Face and hands	From ten to three in the evening	No	Scarcely	I do not know
2022-08-11 16:16:06	40	Married	Master and above	Employee	Saudi	Four children and more	8	Rented house	From 10-20 thousand riyals per month	Bottle feeding	Yes	Doctor/Nurse	Yes	Bone health, Helps healthy pregnancy, Prevents arthritis, Prevents depression, Important for child health and growth	Food	Milk and dairy products, Vegetables, Yolk, Liver	No	I do not expose my child to the sun	Indirectly (Behind the glass, for example)	I do not expose my child to the sun	I do not expose my child to the sun	No	Yes	Sometimes	Because the child gets a dose of vitamin D from formula or Cereal	Yes	Yes	Yes	From time to time	Yes	Yes	Yes	No	Sometimes	Sometimes	Scarcely	No	Sometimes	No	less than an hour	Face and hands	Before ten in the morning	No	Sometimes	No
2022-08-18 22:38:15	40	Married	High school	Unemployed	Saudi	Four children and more	8	Owing house	From 10-20 thousand riyals per month	Breast feeding	Yes	Friends – family, Doctor/Nurse	I don't know	Bone health, Boosts immunity, Helps healthy pregnancy, Important for skin health, Important for child health and growth	Sun	Milk and dairy products, Yolk, Liver	No	All the body	Indirectly (Behind the glass, for example)	Between 10 in the morning and 3 in the afternoon	Less than an hour	No	Yes	Sometimes	Because the child gets a dose of vitamin D from formula or Cereal	Yes	Yes	Yes	From time to time	Yes	Yes	Yes	Yes	Sometimes	Sometimes	Sometimes	Yes	Sometimes	Yes	less than an hour	Face, hands, and legs	Before ten in the morning	Yes	Scarcely	No
2022-09-17 23:30:40	40	Married	Bachelor	Employee	Saudi	Four children and more	8	Owing house	From 5 - less than 10000 riyals per month	Breast feeding	Yes	From studying at school/university	I don't know	Bone health, Boosts immunity, Helps healthy pregnancy, Prevents stroke, Prevents diabetes, Prevents high blood pressure	Sun, Food, Food supplements	Milk and dairy products, Vegetables	Yes	All the body	Directly	Before ten in the morning	Less than an hour	Yes	Yes	Sometimes	Forget	Yes	Yes	Yes	Periodically	Yes	Yes	Yes	Yes	Always	Always	Always	Yes	Yes	Yes	less than an hour	Face and hands	Before ten in the morning	Yes	Always	Yes
2022-09-20 16:54:53	42	Married	Uneducated	Unemployed	Saudi	Four children and more	8	Owing house	Less than 5,000 riyals per month	Breast feeding	Yes	Social media (Snapchat, Instagram, Facebook...)	I don't know	Bone health, Boosts immunity	Sun, Food, Food supplements	Milk and dairy products, Fish, Yolk	No	All the body	Indirectly (Behind the glass, for example)	Between 10 in the morning and 3 in the afternoon	Less than an hour	No	Yes	Sometimes	Forget	Yes	Yes	Yes	From time to time	Yes	Yes	No	Yes	Sometimes	Always		Yes	Sometimes	No	less than an hour	Face, hands, and legs	From ten to three in the evening	No	Never use sunscreen	I do not know
2022-08-01 14:26:55	27	Married	Bachelor	Employee	Saudi	Two children	9	Owing house	From 5 - less than 10000 riyals per month	Bottle feeding	Yes	Friends – family, From studying at school/university, Doctor/Nurse	Yes	Bone health, Boosts immunity, Prevents depression, Important for child health and growth	Sun	Milk and dairy products, Fish, Yolk	No	All the body	Directly	Before ten in the morning	Less than an hour	Yes	No	Do not apply	Other reasons (The child does not need vitamin D)	No	Yes	Yes	From time to time	Yes	No	Yes	Yes	never	never	Permanently	Yes	Sometimes	No	less than an hour	Face, hands, and legs	Before ten in the morning	Yes	Sometimes	No
2022-09-11 14:24:16	30	Married	Bachelor	Employee	Saudi	Four children and more	9	Owing house	From 5 - less than 10000 riyals per month	Bottle feeding	Yes	TV, radio, advertisements, Doctor/Nurse	Yes	Bone health, Boosts immunity, Helps healthy pregnancy, Prevents arthritis, Prevents depression, Important for hair health, Prevents obesity and weight gain, Important for skin health, Important for child health and growth	Sun	Milk and dairy products, Fish	Yes	Feet and legs	Indirectly (Behind the glass, for example)	Before ten in the morning	Less than an hour	No	No	Sometimes	Forget, Because the mother is busy with the job	Yes	Yes	Yes	From time to time	Yes	Yes	Yes	No	never	Scarcely	Permanently	Yes	Yes	Yes	less than an hour	Face, hands, and legs	Before ten in the morning	Yes	Always	No
2022-08-02 21:22:59	34	Married	Bachelor	Employee	Saudi	Three kids	9	Owing house	More than 20 thousand riyals per month	Bottle feeding	Yes	TV, radio, advertisements, Social media (Snapchat, Instagram, Facebook...), Friends – family	I don't know	Bone health, Boosts immunity, Important for child health and growth	Sun	I don't know	No	I do not expose my child to the sun	Indirectly (Behind the glass, for example)	I do not expose my child to the sun	I do not expose my child to the sun	No	Yes	Always	Other reasons (The child does not need vitamin D), اعطي اولادي ٤ قطرات يوميا لسنتين فقط	No	Yes	Yes	At the request of the doctor	Yes	Yes	Yes	Yes	never	Sometimes	Permanently	Yes	Sometimes	No	less than an hour	Face, hands, and legs	Before ten in the morning	No	Scarcely	I do not know
2022-08-30 07:16:01	35	Married	Bachelor	Unemployed	Saudi	Two children	9	Owing house	From 5 - less than 10000 riyals per month	Bottle feeding	Yes	Social media (Snapchat, Instagram, Facebook...), From studying at school/university, Doctor/Nurse	Yes	Bone health, Helps healthy pregnancy, Prevents depression, Important for hair health, Important for child health and growth	Sun	Milk and dairy products, Fish	No	All the body	Directly	Before ten in the morning	From one to two hours	Yes	Yes	Sometimes	Because I expose it to the sun, there is no need to take vitamin D doses	Yes	Yes	Yes	Periodically	Yes	Yes	No	Yes	Sometimes	Always	Sometimes	Yes	Sometimes	No	less than an hour	Face, hands, and legs	Before ten in the morning	No	Never use sunscreen	Yes
2022-07-31 21:38:52	40	Married	Bachelor	Unemployed	Saudi	Three kids	9	Rented house	More than 20 thousand riyals per month	Both	Yes	Social media (Snapchat, Instagram, Facebook...), Doctor/Nurse	I don't know	I don't know	Sun	I don't know	No	All the body	Directly	After three in the afternoon	From one to two hours	No	No	Do not apply	Because vitamin D doses are not necessary	Yes	No	No	At the request of the doctor	No	No	No	No	Scarcely	never	Permanently	Yes	Sometimes	No	From one to two hours	Face and hands	After three o'clock in the evening	Yes	Sometimes	Yes
2022-09-17 23:38:04	45	Divorced	High school	Unemployed	Saudi	Four children and more	9	Rented house	From 5 - less than 10000 riyals per month	Breast feeding	Yes	Friends – family, Doctor/Nurse	Yes	Bone health, Boosts immunity, Helps healthy pregnancy, Prevents stroke, Prevents diabetes, Prevents high blood pressure, Prevents arthritis, Prevents depression, Important for hair health, Prevents obesity and weight gain, Important for skin health, Important for child health and growth	Sun, Food, Food supplements	Milk and dairy products, Fruits, Vegetables, Yolk	Yes	All the body	Directly	Before ten in the morning	Less than an hour	Yes	No	Scarcely	Forget, Child's illness	Yes	Yes	Yes	From time to time	No	Yes	No	Yes	Scarcely	Sometimes	Scarcely	Yes	Yes	Yes	less than an hour	Face and hands	Before ten in the morning	Yes	Sometimes	No
2022-08-18 06:52:56	50	Divorced	High school	Unemployed	Saudi	Four children and more	9	Owing house	Less than 5,000 riyals per month	Both	Yes	Doctor/Nurse	Yes	Bone health	Sun	Fish	Yes	All the body	Indirectly (Behind the glass, for example)	Before ten in the morning	Less than an hour	No	Yes	Scarcely	Forget	Yes	Yes	Yes	At the request of the doctor	Yes	Yes	No	Yes	never	never	Permanently	Yes	Sometimes	No	less than an hour	Face and hands	Before ten in the morning	No	Never use sunscreen	I do not know
2022-09-17 23:47:46	25	Married	Bachelor	Employee	Saudi	One child	10	Owing house	Less than 5,000 riyals per month	Breast feeding	Yes	Social media (Snapchat, Instagram, Facebook...)	Yes	Boosts immunity, Prevents stroke, Important for hair health, Important for child health and growth	Sun	Milk and dairy products	Yes	All the body	Directly	Before ten in the morning	Less than an hour	No	No	Sometimes	Child's illness	Yes	No	Yes	Periodically	Yes	Yes	Yes	Yes	Sometimes	Always	Always	Yes	Yes	Yes	less than an hour	Face, hands, and legs	Before ten in the morning	Yes	Sometimes	Yes
2022-08-12 16:58:52	28	Married	Bachelor	Unemployed	Saudi	One child	10	Owing house	From 5 - less than 10000 riyals per month	Bottle feeding	Yes	Social media (Snapchat, Instagram, Facebook...), Doctor/Nurse	Yes	Bone health, Prevents arthritis, Important for child health and growth	Sun	Milk and dairy products	No	I do not expose my child to the sun	Indirectly (Behind the glass, for example)	I do not expose my child to the sun	I do not expose my child to the sun	Yes	Yes	Sometimes	Forget	Yes	Yes	Yes	From time to time	Yes	Yes	Yes	No	Sometimes	never	Permanently	Yes	Sometimes	No	less than an hour	Face, hands, and legs	From ten to three in the evening	No	Never use sunscreen	No
2022-09-13 22:01:15	34	Married	Bachelor	Unemployed	Saudi	Four children and more	10	Owing house	Less than 5,000 riyals per month	Both	Yes	Doctor/Nurse	No	Bone health, Boosts immunity, Prevents arthritis, Prevents depression, Important for hair health, Important for skin health, Important for child health and growth	Sun	Yolk, لا أعرف	No	Feet and legs	Indirectly (Behind the glass, for example)	Between 10 in the morning and 3 in the afternoon	Less than an hour	Yes	Yes	Always	Forget	Yes	Yes	Yes	From time to time	Yes	Yes	Yes	Yes	Always	Always	Always	Yes	Yes	No	From one to two hours	Face, hands, and legs	From ten to three in the evening	Yes	Sometimes	Yes
2022-08-01 16:15:38	33	Married	Bachelor	Employee	Non-Saudi	Three kids	11	Rented house	From 10-20 thousand riyals per month	Bottle feeding	Yes	From studying at school/university	Yes	Bone health, Boosts immunity, Prevents stroke, Prevents diabetes, Prevents high blood pressure, Prevents arthritis, Prevents depression, Important for hair health, Important for skin health, Important for child health and growth	Food	Milk and dairy products, Fruits, Vegetables, Fish, Yolk	Yes	Feet and legs	Indirectly (Behind the glass, for example)	After three in the afternoon	Less than an hour	Yes	Yes	Sometimes	Because the child gets a dose of vitamin D from formula or Cereal, Because the mother is busy with the job	Yes	Yes	Yes	Periodically	Yes	Yes	Yes	No	never	never	Sometimes	Yes	Yes	Yes	From one to two hours	Face, hands, and legs	Before ten in the morning	Yes	Always	No
2022-09-18 00:09:52	37	Married	Bachelor	Employee	Saudi	Four children and more	11	Owing house	From 10-20 thousand riyals per month	Bottle feeding	Yes	TV, radio, advertisements, Social media (Snapchat, Instagram, Facebook...), Doctor/Nurse	Yes	Bone health, Boosts immunity, Helps healthy pregnancy, Prevents depression, Important for hair health	Sun, Food supplements	Fish, Liver	No	I do not expose my child to the sun	Indirectly (Behind the glass, for example)	After three in the afternoon	Less than an hour	No	Yes	Always	Other reasons (The child does not need vitamin D)	Yes	Yes	Yes	Periodically	Yes	Yes	Yes	Yes	Always	Always	Always	Yes	Yes	Yes	From one to two hours	Face and hands	Before ten in the morning	Yes	Always	No
2022-08-18 22:20:10	50	Married	Bachelor	Employee	Saudi	Four children and more	11	Owing house	More than 20 thousand riyals per month	Breast feeding	Yes	TV, radio, advertisements, Magazines, Books, From studying at school/university	Yes	Bone health, Important for skin health	Sun	Milk and dairy products	Yes	Feet and legs	Directly	Before ten in the morning	From one to two hours	Yes	Yes	Always	Because the mother is busy with the job	Yes	Yes	Yes	Periodically	Yes	Yes	Yes	Yes	Sometimes	Always	Sometimes	Yes	Yes	Yes	From one to two hours	Face, hands, and legs	Before ten in the morning	Yes	Always	No
2022-09-11 19:43:42	24	Married	Bachelor	Unemployed	Saudi	One child	12	Owing house	From 5 - less than 10000 riyals per month	Bottle feeding	Yes	Doctor/Nurse	I don't know	Bone health, Important for child health and growth	Food supplements	Yolk	No	I do not expose my child to the sun	Indirectly (Behind the glass, for example)	Before ten in the morning	Less than an hour	No	Yes	Always	Forget	No	Yes	Yes	Periodically	Yes	Yes	Yes	Yes	Sometimes	Sometimes	Always	Yes	No	No	less than an hour	Face, hands, and legs	From ten to three in the evening	Yes	Sometimes	Yes
2022-07-31 13:55:08	28	Married	Bachelor	Unemployed	Saudi	Two children	12	Rented house	From 10-20 thousand riyals per month	Bottle feeding	Yes	Social media (Snapchat, Instagram, Facebook...), Friends – family, Doctor/Nurse	Yes	Bone health, Boosts immunity, Helps healthy pregnancy, Prevents stroke, Prevents diabetes, Prevents high blood pressure, Prevents arthritis, Prevents depression, Important for hair health, Prevents obesity and weight gain, Important for skin health, Important for child health and growth	Sun	Milk and dairy products, Yolk	No	I do not expose my child to the sun	Indirectly (Behind the glass, for example)	Before ten in the morning	I do not expose my child to the sun	Yes	No	Do not apply	Because the child gets a dose of vitamin D from formula or Cereal	No	No	Yes	From time to time	No	No	No	Yes	never	never	Sometimes	Yes	Sometimes	No	less than an hour	Face and hands	Before ten in the morning	Yes	Sometimes	No
2022-09-18 00:17:26	30	Married	Bachelor	Unemployed	Saudi	Three kids	12	Rented house	More than 20 thousand riyals per month	Bottle feeding	Yes	Friends – family, Doctor/Nurse	I don't know	Bone health, Boosts immunity, Helps healthy pregnancy, Prevents arthritis, Important for hair health, Important for child health and growth	Sun	Milk and dairy products, Fish, Yolk, Liver	No	All the body	Directly	Before ten in the morning	Less than an hour	No	No	Scarcely	Because the child gets a dose of vitamin D from formula or Cereal	Yes	Yes	Yes	From time to time	Yes	Yes	No	No	Scarcely	Sometimes	Permanently	Yes	No	No	less than an hour	Face and hands	Before ten in the morning	Sometimes	Scarcely	No
2022-08-02 21:45:25	31	Married	Bachelor	Unemployed	Saudi	Three kids	12	Owing house	From 10-20 thousand riyals per month	Bottle feeding	Yes	Doctor/Nurse	Yes	Bone health, Boosts immunity, Helps healthy pregnancy, Important for skin health, Important for child health and growth	Sun	Yolk, Liver	Yes	Feet and legs	Indirectly (Behind the glass, for example)	Before ten in the morning	From one to two hours	No	Yes	Always	Other reasons (The child does not need vitamin D)	No	Yes	Yes	From time to time	Yes	Yes	No	No	Scarcely	never	Permanently	No	Yes	No	less than an hour	Face, hands, and legs	Before ten in the morning	No	Scarcely	No
2022-07-31 07:13:50	34	Married	High school	Unemployed	Saudi	Four children and more	12	Rented house	From 5 - less than 10000 riyals per month	Both	Yes	From studying at school/university	Yes	Bone health, Boosts immunity, Prevents arthritis, Prevents depression, Important for hair health, Important for child health and growth	Sun	Milk and dairy products, Fish, Yolk	No	Feet and legs	Indirectly (Behind the glass, for example)	After three in the afternoon	Less than an hour	No	Yes	Sometimes	Forget, Child's illness, Mother's preoccupation with other children	Yes	Yes	Yes	At the request of the doctor	Yes	Yes	No	Yes	Sometimes	Always	Scarcely	Yes	Yes	No	less than an hour	Face, hands, and legs	After three o'clock in the evening	Yes	Sometimes	No
2022-07-31 11:22:24	34	Married	Bachelor	Employee	Saudi	Three kids	12	Owing house	From 5 - less than 10000 riyals per month	Bottle feeding	Yes	Social media (Snapchat, Instagram, Facebook...), From studying at school/university, Doctor/Nurse	Yes	Bone health, Boosts immunity, Helps healthy pregnancy, Prevents stroke, Prevents high blood pressure, Prevents arthritis, Prevents depression, Important for hair health, Important for child health and growth	Sun	Milk and dairy products, Fish, Yolk, Liver	No	Feet and legs	Indirectly (Behind the glass, for example)	Before ten in the morning	Less than an hour	Yes	Yes	Sometimes	Because the mother is busy with the job	Yes	Yes	Yes	From time to time	Yes	Yes	No	Yes	Sometimes	Sometimes	Sometimes	Yes	Yes	No	less than an hour	Face, hands, and legs	Before ten in the morning	Yes	Sometimes	No
2022-09-11 11:38:30	35	Married	High school	Unemployed	Saudi	Four children and more	12	Owing house	From 10-20 thousand riyals per month	Breast feeding	Yes	TV, radio, advertisements, Doctor/Nurse	I don't know	Bone health, Boosts immunity, Prevents high blood pressure, Prevents depression, Prevents obesity and weight gain, Important for child health and growth	Sun	Fruits, Vegetables, Yolk, لا أعرف	No	I do not expose my child to the sun	Indirectly (Behind the glass, for example)	I do not expose my child to the sun	I do not expose my child to the sun	No	Yes	Sometimes	Forget	No	Yes	Yes	From time to time	Yes	Yes	No	No	never	never	Permanently	Yes	Sometimes	No	less than an hour	Face, hands, and legs	Before ten in the morning	Sometimes	Sometimes	I do not know
2022-09-12 21:39:01	38	Married	Master and above	Employee	Saudi	Four children and more	12	Owing house	From 5 - less than 10000 riyals per month	Bottle feeding	Yes	From studying at school/university, Doctor/Nurse	Yes	Bone health, Boosts immunity, Important for child health and growth	Sun	Milk and dairy products, Fish, Liver	No	Feet and legs	Indirectly (Behind the glass, for example)	Before ten in the morning	Less than an hour	No	Yes	Sometimes	Forget	Yes	Yes	Yes	From time to time	Yes	Yes	Yes	Yes	Sometimes	Sometimes	Permanently	Yes	Yes	Yes	less than an hour	Face and hands	Before ten in the morning	Sometimes	Scarcely	No
2022-09-24 14:37:40	38	Married	High school	Unemployed	Saudi	Four children and more	12	Rented house	From 5 - less than 10000 riyals per month	Bottle feeding	Yes	Friends – family, From studying at school/university, Doctor/Nurse	Yes	Prevents depression, Important for child health and growth	Sun, Food supplements	Milk and dairy products	Yes	All the body	Directly	After three in the afternoon	From one to two hours	Yes	Yes	Sometimes	Because I expose it to the sun, there is no need to take vitamin D doses, Because the child gets a dose of vitamin D from formula or Cereal	Yes	Yes	Yes	From time to time	Yes	Yes	Yes	Yes	Sometimes	Sometimes	Permanently	Yes	Yes	Yes	less than an hour	Face, hands, and legs	After three o'clock in the evening	Yes	Sometimes	I do not know
2022-07-31 00:29:08	40	Divorced	Secondary	Unemployed	Saudi	One child	12	Owing house	More than 20 thousand riyals per month	Bottle feeding	Yes	Social media (Snapchat, Instagram, Facebook...)	Yes	Bone health, Boosts immunity, Prevents arthritis, Prevents depression, Important for hair health, Important for child health and growth	Sun	I don't know	No	Feet and legs	Indirectly (Behind the glass, for example)	After three in the afternoon	Less than an hour	Yes	No	Scarcely	Other reasons (The child does not need vitamin D)	Yes	Yes	Yes	From time to time	Yes	Yes	Yes	No	never	never	Permanently	Yes	Sometimes	No	less than an hour	Face, hands, and legs	After three o'clock in the evening	Yes	Always	I do not know
2022-08-18 22:44:42	40	Married	Bachelor	Employee	Saudi	Four children and more	12	Owing house	More than 20 thousand riyals per month	Breast feeding	Yes	TV, radio, advertisements, Social media (Snapchat, Instagram, Facebook...), Friends – family, Doctor/Nurse	Yes	Helps healthy pregnancy, Prevents diabetes, Prevents depression, Important for hair health, Important for child health and growth	Food supplements	Milk and dairy products, Vegetables, Liver	Yes	All the body	Directly	Before ten in the morning	Less than an hour	Yes	No	Do not apply	Because I expose it to the sun, there is no need to take vitamin D doses	No	Yes	No	Periodically	Yes	Yes	No	Yes	never	Always	Always	No	Yes	Yes	From one to two hours	Face only	From ten to three in the evening	Yes	Sometimes	No
2022-09-20 12:43:57	43	Married	Bachelor	Employee	Saudi	Four children and more	12	Rented house	From 5 - less than 10000 riyals per month	Bottle feeding	Yes	Social media (Snapchat, Instagram, Facebook...), Friends – family, Doctor/Nurse	Yes	Bone health, Prevents arthritis, Prevents depression, Important for child health and growth	Sun, Food	Milk and dairy products, Fish, Yolk, Liver	No	All the body	Directly	Before ten in the morning	Less than an hour	No	Yes	Sometimes	Forget	Yes	Yes	Yes	From time to time	Yes	Yes	Yes	No	Scarcely	never	Sometimes	No	No	No	less than an hour	Face, hands, and legs	Before ten in the morning	Yes	Sometimes	No
2022-07-31 21:01:55	45	Married	Master and above	Unemployed	Non-Saudi	Four children and more	12	Owing house	Less than 5,000 riyals per month	Bottle feeding	Yes	From studying at school/university	I don't know	Bone health, Boosts immunity, Important for child health and growth	Sun	Fruits	Yes	Feet and legs	Directly	Before ten in the morning	6 hours and more	No	Yes	Always	Forget	Yes	Yes	Yes	Periodically	Yes	Yes	No	No	never	never	Permanently	Yes	No	Yes	From one to two hours	Face and hands	From ten to three in the evening	No	Never use sunscreen	I do not know
2022-08-11 00:56:38	45	Married	Bachelor	Unemployed	Saudi	Four children and more	12	Owing house	From 10-20 thousand riyals per month	Bottle feeding	Yes	Social media (Snapchat, Instagram, Facebook...)	Yes	Boosts immunity, Prevents depression, Important for child health and growth	Sun	Fish	No	All the body	Indirectly (Behind the glass, for example)	Before ten in the morning	Less than an hour	No	No	Scarcely	Forget	Yes	Yes	Yes	Periodically	Yes	Yes	No	No	Sometimes	never	Scarcely	Yes	Sometimes	No	less than an hour	Face, hands, and legs	Before ten in the morning	No	Scarcely	I do not know
2022-09-19 17:47:04	45	Married	Bachelor	Unemployed	Saudi	Four children and more	12	Owing house	From 5 - less than 10000 riyals per month	Bottle feeding	Yes	Social media (Snapchat, Instagram, Facebook...)	Yes	Bone health, Boosts immunity, Prevents stroke, Prevents arthritis, Prevents depression, Important for hair health, Important for skin health, Important for child health and growth	Sun	Milk and dairy products, Fruits, Vegetables, Fish, Liver	No	I do not expose my child to the sun	Indirectly (Behind the glass, for example)	I do not expose my child to the sun	I do not expose my child to the sun	No	Yes	Sometimes	Forget	Yes	Yes	Yes	From time to time	Yes	Yes	Yes	Yes	Always	never	Sometimes	Yes	Sometimes	No	less than an hour	Face only	After three o'clock in the evening	Sometimes	Scarcely	No
2022-08-02 21:45:40	39	Married	Bachelor	Employee	Saudi	Four children and more	13	Owing house	More than 20 thousand riyals per month	Bottle feeding	Yes	Doctor/Nurse	I don't know	Bone health	Food supplements	I don't know	No	All the body	Indirectly (Behind the glass, for example)	Other times	I do not expose my child to the sun	No	Yes	Sometimes	Forget	Yes	Yes	Yes	Periodically	Yes	Yes	No	Yes	never	never	Permanently	Yes	Sometimes	No	From one to two hours	Face, hands, and legs	Before ten in the morning	Yes	Sometimes	I do not know
2022-08-18 07:17:02	40	Married	High school	Employee	Saudi	Four children and more	13	Owing house	From 5 - less than 10000 riyals per month	Breast feeding	Yes	Doctor/Nurse	Yes	Bone health	Sun	Milk and dairy products	Yes	All the body	Directly	Between 10 in the morning and 3 in the afternoon	Less than an hour	No	Yes	Sometimes	Because I expose it to the sun, there is no need to take vitamin D doses	Yes	Yes	Yes	Periodically	Yes	Yes	No	No	Sometimes	Sometimes	Permanently	Yes	Yes	No	From one to two hours	Face, hands, and legs	From ten to three in the evening	No	Never use sunscreen	I do not know
2022-08-29 15:46:21	40	Married	High school	Unemployed	Non-Saudi	Four children and more	13	Rented house	Less than 5,000 riyals per month	Bottle feeding	Yes	Doctor/Nurse	Yes	Bone health	Sun	Liver	Yes	Feet and legs	Indirectly (Behind the glass, for example)	Before ten in the morning	From one to two hours	Yes	No	Sometimes	Because I expose it to the sun, there is no need to take vitamin D doses	Yes	Yes	Yes	At the request of the doctor	Yes	Yes	No	Yes	Sometimes	Sometimes	Sometimes	Yes	Yes	Yes	From one to two hours	Face, hands, and legs	Before ten in the morning	Yes	Sometimes	I do not know
2022-08-01 08:36:28	28	Married	High school	Unemployed	Saudi	Four children and more	14	Owing house	From 5 - less than 10000 riyals per month	Breast feeding	Yes	Doctor/Nurse	Yes	Bone health, Boosts immunity, Helps healthy pregnancy, Prevents depression, Important for hair health, Prevents obesity and weight gain, Important for skin health, Important for child health and growth, أخرى, ارجو ذكرها	Sun	Milk and dairy products, Fruits, Vegetables, Fish, Yolk	Yes	All the body	Directly	Before ten in the morning	Less than an hour	Yes	Yes	Always	Because I expose it to the sun, there is no need to take vitamin D doses	Yes	Yes	Yes	From time to time	Yes	Yes	Yes	No	Sometimes	Sometimes	Sometimes	Yes	Yes	Yes	less than an hour	Face, hands, and legs	Before ten in the morning	Yes	Always	No
2022-08-29 14:09:23	29	Married	Bachelor	Unemployed	Saudi	Two children	14	Rented house	From 5 - less than 10000 riyals per month	Bottle feeding	Yes	Social media (Snapchat, Instagram, Facebook...), Friends – family, Doctor/Nurse	I don't know	Bone health, Boosts immunity, Helps healthy pregnancy, Prevents depression, Important for child health and growth	Sun	I don't know	No	All the body	Directly	Before ten in the morning	Less than an hour	Yes	Yes	Sometimes	Forget, Mother's preoccupation with other children	Yes	No	Yes	From time to time	Yes	Yes	No	No	Sometimes	never	Permanently	Yes	No	No	less than an hour	Face and hands	Before ten in the morning	No	Scarcely	No
2022-08-02 21:49:11	32	Married	Bachelor	Employee	Saudi	One child	14	Owing house	More than 20 thousand riyals per month	Bottle feeding	Yes	TV, radio, advertisements, Social media (Snapchat, Instagram, Facebook...), From studying at school/university, Doctor/Nurse	I don't know	Bone health, Boosts immunity, Helps healthy pregnancy, Prevents depression, Important for child health and growth	Sun	Milk and dairy products, Yolk	Yes	All the body	Directly	After three in the afternoon	From one to two hours	No	Yes	Sometimes	Forget, Because I expose it to the sun, there is no need to take vitamin D doses, Because the child gets a dose of vitamin D from formula or Cereal, Because the mother is busy with the job	Yes	Yes	Yes	Periodically	Yes	Yes	Yes	No	Sometimes	never	Permanently	Yes	No	No	less than an hour	Face and hands	Before ten in the morning	Yes	Sometimes	No
2022-09-13 00:25:26	34	Married	Bachelor	Unemployed	Non-Saudi	Three kids	14	Owing house	Less than 5,000 riyals per month	Breast feeding	Yes	Social media (Snapchat, Instagram, Facebook...), Friends – family, From studying at school/university, Doctor/Nurse	I don't know	Bone health, Prevents arthritis, Prevents depression, Important for hair health, Prevents obesity and weight gain, Important for skin health, Important for child health and growth	Sun	Fruits, Vegetables, Fish	Yes	All the body	Indirectly (Behind the glass, for example)	Between 10 in the morning and 3 in the afternoon	From one to two hours	Yes	Yes	Always	Forget	Yes	Yes	Yes	Periodically	Yes	Yes	Yes	Yes	Sometimes	Sometimes	Sometimes	Yes	Yes	Yes	From one to two hours	Face, hands, and legs	From ten to three in the evening	No	Sometimes	No
2022-08-18 17:51:02	40	Married	High school	Unemployed	Saudi	Four children and more	14	Owing house	More than 20 thousand riyals per month	Bottle feeding	Yes	Social media (Snapchat, Instagram, Facebook...)	I don't know	Bone health, Boosts immunity, Prevents arthritis, Prevents depression, Important for child health and growth	Sun	Milk and dairy products, Fish, Yolk, Liver	No	I do not expose my child to the sun	Indirectly (Behind the glass, for example)	I do not expose my child to the sun	I do not expose my child to the sun	No	Yes	Always	Forget	Yes	Yes	Yes	From time to time	Yes	No	No	No	Sometimes	Sometimes	Sometimes	Yes	Sometimes	No	less than an hour	Face only	After three o'clock in the evening	No	Scarcely	No
2022-08-10 05:45:08	25	Married	Bachelor	Unemployed	Non-Saudi	Two children	15	Owing house	Less than 5,000 riyals per month	Both	Yes	Doctor/Nurse	No	Bone health, Boosts immunity, Important for child health and growth	Sun	I don't know	No	Feet and legs	Indirectly (Behind the glass, for example)	After three in the afternoon	Less than an hour	Yes	Yes	Always	Forget	Yes	Yes	Yes	From time to time	Yes	Yes	No	No	Sometimes	never	Scarcely	Yes	No	No	less than an hour	Face and hands	From ten to three in the evening	No	Never use sunscreen	No
2022-09-18 00:07:13	27	Married	Bachelor	Employee	Saudi	Two children	15	Rented house	From 5 - less than 10000 riyals per month	Bottle feeding	Yes	TV, radio, advertisements, Social media (Snapchat, Instagram, Facebook...)	I don't know	Bone health, Important for hair health, Important for skin health, Important for child health and growth	Sun	Milk and dairy products, Fish, Yolk	No	Feet and legs	Indirectly (Behind the glass, for example)	Between 10 in the morning and 3 in the afternoon	Less than an hour	No	Yes	Sometimes	Forget	Yes	No	Yes	From time to time	Yes	No	No	Yes	Sometimes	never	Permanently	Yes	Yes	No	less than an hour	Face, hands, and legs	Before ten in the morning	Yes	Always	I do not know
2022-08-01 17:43:48	30	Married	Bachelor	Unemployed	Saudi	Three kids	15	Owing house	From 5 - less than 10000 riyals per month	Bottle feeding	Yes	Social media (Snapchat, Instagram, Facebook...), Doctor/Nurse	I don't know	Bone health, Boosts immunity, Prevents depression, Important for hair health, Important for skin health, Important for child health and growth	Sun	Milk and dairy products, Fish, Yolk	No	All the body	Directly	After three in the afternoon	Less than an hour	No	Yes	Sometimes	Forget	Yes	Yes	Yes	Periodically	Yes	Yes	Yes	Yes	Sometimes	Sometimes	Sometimes	Yes	Sometimes	No	less than an hour	Face and hands	After three o'clock in the evening	No	Scarcely	No
2022-08-18 20:41:52	50	Divorced	Bachelor	Employee	Saudi	Four children and more	15	Owing house	From 5 - less than 10000 riyals per month	Both	Yes	Doctor/Nurse	I don't know	Bone health, Boosts immunity, Prevents arthritis, Important for child health and growth	Food supplements	Fruits, Fish, Yolk, Liver	Yes	Feet and legs	Directly	Before ten in the morning	Less than an hour	Yes	Yes	Always	Forget	Yes	Yes	Yes	At the request of the doctor	No	Yes	No	No	Sometimes	Sometimes	Scarcely	Yes	Sometimes	Yes	less than an hour	Face, hands, and legs	From ten to three in the evening	No	Sometimes	Yes
2022-08-18 07:35:55	27	Married	Bachelor	Employee	Saudi	One child	16	Rented house	From 5 - less than 10000 riyals per month	Bottle feeding	Yes	Doctor/Nurse	I don't know	Bone health, Boosts immunity, Prevents arthritis, Important for hair health, Prevents obesity and weight gain, Important for child health and growth	Sun	Fish, Yolk	No	I do not expose my child to the sun	Indirectly (Behind the glass, for example)	Before ten in the morning	Less than an hour	No	Yes	Always	Other reasons (The child does not need vitamin D)	Yes	Yes	Yes	From time to time	Yes	Yes	Yes	Yes	Sometimes	Sometimes	Always	Yes	Yes	Yes	less than an hour	Face and hands	After three o'clock in the evening	Yes	Always	Yes
2022-08-19 17:31:42	27	Married	Bachelor	Unemployed	Saudi	One child	16	Rented house	From 5 - less than 10000 riyals per month	Bottle feeding	Yes	Doctor/Nurse	I don't know	Bone health, Boosts immunity, Prevents arthritis, Prevents depression, Important for hair health, Important for skin health, Important for child health and growth	Sun	Yolk	Yes	All the body	Directly	Before ten in the morning	From one to two hours	No	Yes	Sometimes	Forget	Yes	Yes	Yes	From time to time	Yes	Yes	No	Yes	never	never	Sometimes	Yes	No	No	From one to two hours	Face, hands, and legs	Before ten in the morning	Yes	Sometimes	No
2022-09-12 20:51:37	27	Married	Bachelor	Unemployed	Saudi	Two children	16	Owing house	Less than 5,000 riyals per month	Breast feeding	Yes	Doctor/Nurse	Yes	Important for child health and growth	Sun	Milk and dairy products	No	Feet and legs	Indirectly (Behind the glass, for example)	Between 10 in the morning and 3 in the afternoon	Less than an hour	Yes	Yes	Always	Forget	Yes	Yes	Yes	At the request of the doctor	Yes	No	No	Yes	Sometimes	never	Permanently	Yes	Yes	No	From one to two hours	Face and hands	Before ten in the morning	Yes	Always	Yes
2022-09-14 19:18:05	27	Married	Bachelor	Unemployed	Non-Saudi	Two children	16	Rented house	From 5 - less than 10000 riyals per month	Breast feeding	Yes	Social media (Snapchat, Instagram, Facebook...), Friends – family, From studying at school/university, Doctor/Nurse	Yes	Bone health, Boosts immunity, Prevents arthritis, Important for hair health, Important for skin health	Sun	Milk and dairy products, Vegetables, Fish, Yolk	Yes	All the body	Indirectly (Behind the glass, for example)	Between 10 in the morning and 3 in the afternoon	From one to two hours	Yes	Yes	Always	Forget	Yes	Yes	Yes	Periodically	Yes	Yes	Yes	No	Sometimes	Sometimes	Sometimes	Yes	Yes	Yes	less than an hour	Face, hands, and legs	From ten to three in the evening	Sometimes	Sometimes	No
2022-08-03 02:29:08	30	Married	Bachelor	Unemployed	Saudi	One child	16	Owing house	More than 20 thousand riyals per month	Bottle feeding	Yes	Social media (Snapchat, Instagram, Facebook...), Friends – family, Doctor/Nurse	I don't know	Bone health, Boosts immunity, Helps healthy pregnancy, Prevents depression, Important for hair health, Important for skin health, Important for child health and growth	Sun	I don't know	No	I do not expose my child to the sun	Indirectly (Behind the glass, for example)	I do not expose my child to the sun	I do not expose my child to the sun	No	Yes	Always	Other reasons (The child does not need vitamin D)	Yes	Yes	Yes	Periodically	Yes	No	Yes	Yes	Sometimes	Always	Permanently	No	No	No	less than an hour	Face only	Before ten in the morning	Yes	Always	No
2022-09-20 12:21:56	60	Married	Bachelor	Unemployed	Saudi	Four children and more	17	Owing house	From 10-20 thousand riyals per month	Breast feeding	Yes	Other	Yes	Bone health, Boosts immunity, Helps healthy pregnancy, Prevents arthritis, Prevents depression, Important for skin health	Sun, Food, Food supplements	Fruits, Fish, Yolk	Yes	All the body	Indirectly (Behind the glass, for example)	After three in the afternoon	From one to two hours	Yes	No	Do not apply	Because I expose it to the sun, there is no need to take vitamin D doses	No	No	Yes	From time to time	No	Yes	Yes	Yes	never	never		Yes	Yes	Yes	6 hours and more	Face, hands, and legs	Before ten in the morning	Sometimes	Sometimes	No
2022-09-20 13:03:46	27	Married	Bachelor	Unemployed	Saudi	Two children	18	Rented house	From 5 - less than 10000 riyals per month	Bottle feeding	Yes	From studying at school/university, Doctor/Nurse	Yes	Bone health, Boosts immunity, Helps healthy pregnancy, Prevents depression, Important for hair health, Important for skin health, Important for child health and growth	Sun, Food, Food supplements	Milk and dairy products, Fish, Yolk	Yes	Feet and legs	Indirectly (Behind the glass, for example)	Between 10 in the morning and 3 in the afternoon	Less than an hour	Yes	Yes	Always		No	Yes	Yes	From time to time	Yes	Yes	No	Yes	never	Always	Sometimes	Yes	Yes	No	less than an hour	Face, hands, and legs	From ten to three in the evening	Yes	Sometimes	No
2022-09-13 14:15:22	28	Married	Secondary	Unemployed	Non-Saudi	Two children	18	Rented house	From 5 - less than 10000 riyals per month	Bottle feeding	Yes	From studying at school/university	Yes	Boosts immunity	Sun	Vegetables	Yes	All the body	Directly	Before ten in the morning	Less than an hour	Yes	Yes	Always	Child's illness	Yes	Yes	Yes	Periodically	Yes	No	No	Yes	Always	Always	Permanently	Yes	Yes	No	From one to two hours	Face, hands, and legs	Before ten in the morning	No	Never use sunscreen	No
2022-07-31 00:50:58	33	Married	Bachelor	Unemployed	Saudi	Four children and more	18	Owing house	From 10-20 thousand riyals per month	Bottle feeding	Yes	From studying at school/university	I don't know	Bone health, Boosts immunity, Prevents depression, Important for child health and growth	Sun	Fish	Yes	Feet and legs	Indirectly (Behind the glass, for example)	After three in the afternoon	6 hours and more	No	No	Do not apply	Because I expose it to the sun, there is no need to take vitamin D doses	No	No	Yes	From time to time	Yes	No	Yes	No	Sometimes	never	Permanently	Yes	Sometimes	No	6 hours and more	Face and hands	After three o'clock in the evening	No	Never use sunscreen	I do not know
2022-09-20 12:04:44	36	Married	Bachelor	Unemployed	Saudi	Three kids	18	Owing house	From 10-20 thousand riyals per month	Bottle feeding	Yes	TV, radio, advertisements, Friends – family, From studying at school/university	Yes	Bone health, Prevents depression, Prevents obesity and weight gain, Important for child health and growth	Sun, Food supplements	Milk and dairy products, Fish, Yolk	Yes	Hands only	Directly	After three in the afternoon	6 hours and more	No	No	Sometimes	Forget, Because I expose it to the sun, there is no need to take vitamin D doses, Because the child gets a dose of vitamin D from formula or Cereal	Yes	Yes	Yes	From time to time	Yes	Yes	No	Yes	Always	Always	Permanently	Yes	Yes	Yes	6 hours and more	Face, hands, and legs	Before ten in the morning	No	Never use sunscreen	Yes
2022-07-31 02:52:01	28	Married	High school	Unemployed	Saudi	Three kids	19	Rented house	From 5 - less than 10000 riyals per month	Bottle feeding	Yes	Friends – family, From studying at school/university	Yes	Bone health, Boosts immunity, Important for hair health, Important for child health and growth	Sun	I don't know	No	I do not expose my child to the sun	Indirectly (Behind the glass, for example)	I do not expose my child to the sun	I do not expose my child to the sun	No	No	Do not apply	Other reasons (The child does not need vitamin D)	No	No	Yes	Periodically	No	Yes	No	No	never	never	Permanently	Yes	No	No	From one to two hours	Face only	Before ten in the morning	No	Never use sunscreen	No
2022-08-19 10:15:21	33	Married	Bachelor	Employee	Saudi	Four children and more	19	Rented house	From 10-20 thousand riyals per month	Bottle feeding	Yes	Doctor/Nurse	I don't know	Bone health, Boosts immunity, Important for child health and growth	Food supplements	Milk and dairy products, Fruits, Vegetables	No	All the body	Directly	After three in the afternoon	Less than an hour	No	Yes	Sometimes	Forget	No	Yes	Yes	From time to time	Yes	No	No	No	Scarcely	never	Sometimes	Yes	Sometimes	No	less than an hour	Face and hands	Before ten in the morning	No	Sometimes	I do not know
2022-09-02 17:39:43	28	Married	Bachelor	Unemployed	Saudi	One child	20	Rented house	From 5 - less than 10000 riyals per month	Bottle feeding	Yes	Social media (Snapchat, Instagram, Facebook...), Doctor/Nurse	Yes	Bone health, Boosts immunity, Prevents arthritis, Prevents depression, Important for hair health, Important for child health and growth	Food supplements	Milk and dairy products	No	All the body	Indirectly (Behind the glass, for example)	After three in the afternoon	Less than an hour	No	Yes	Sometimes	Forget	Yes	Yes	Yes	From time to time	Yes	Yes	No	Yes	Scarcely	Sometimes	Permanently	Yes	Sometimes	No	From one to two hours	Face and hands	After three o'clock in the evening	Yes	Always	I do not know
2022-09-29 07:21:35	31	Married	High school	Unemployed	Non-Saudi	Four children and more	20	Owing house	Less than 5,000 riyals per month	Both	Yes	Doctor/Nurse	Yes	Bone health, Important for hair health, Important for skin health, Important for child health and growth	Sun	Milk and dairy products, Vegetables, Fish, Yolk	No	All the body	Directly	Other times	From one to two hours	No	No	Do not apply	Forget	Yes	Yes	Yes	From time to time	Yes	Yes	No	No	Scarcely	Scarcely	Scarcely	Yes	No	No	From one to two hours	Face and hands	Before ten in the morning	Yes	Always	No
2022-09-24 14:57:58	39	Married	Bachelor	Unemployed	Saudi	Four children and more	20	Rented house	From 10-20 thousand riyals per month	Bottle feeding	Yes	TV, radio, advertisements, Social media (Snapchat, Instagram, Facebook...), Friends – family	No	Bone health, Boosts immunity, Important for hair health, Important for child health and growth	Sun, Food	Milk and dairy products, Fish, Yolk	No	Feet and legs	Directly	I do not expose my child to the sun	I do not expose my child to the sun	Yes	No	Do not apply	Forget	No	No	Yes	Periodically	Yes	Yes	No	No	never	never	Permanently	No	Yes	No	less than an hour	Face, hands, and legs	Before ten in the morning	No	Never use sunscreen	No
2022-08-29 20:52:23	40	Married	Bachelor	Unemployed	Saudi	Four children and more	20	Owing house	From 5 - less than 10000 riyals per month	Both	Yes	Doctor/Nurse	I don't know	Bone health, Boosts immunity, Prevents arthritis, Important for hair health, Important for child health and growth	Sun	Vegetables	No	Feet and legs	Directly	Before ten in the morning	Less than an hour	Yes	Yes	Sometimes	Forget	Yes	Yes	Yes	From time to time	Yes	Yes	Yes	No	Sometimes	never	Scarcely	No	No	No	less than an hour	Face, hands, and legs	After three o'clock in the evening	Yes	Scarcely	I do not know
2022-08-18 23:15:38	32	Married	Bachelor	Unemployed	Saudi	Three kids	21	Rented house	Less than 5,000 riyals per month	Bottle feeding	Yes	Social media (Snapchat, Instagram, Facebook...), Friends – family, Magazines, Books, From studying at school/university, Doctor/Nurse	Yes	Bone health, Boosts immunity, Prevents arthritis, Prevents depression, Important for hair health, Prevents obesity and weight gain, Important for child health and growth	Sun	I don't know	Yes	All the body	Indirectly (Behind the glass, for example)	Before ten in the morning	Less than an hour	No	Yes	Scarcely	Forget, Mother's preoccupation with other children	No	Yes	Yes	From time to time	Yes	No	Yes	No	never	never	Scarcely	Yes	Sometimes	No	less than an hour	Face and hands	Before ten in the morning	No	Never use sunscreen	I do not know
2022-09-12 14:08:07	34	Married	Bachelor	Unemployed	Non-Saudi	One child	21	Rented house	From 5 - less than 10000 riyals per month	Bottle feeding	Yes	Doctor/Nurse	Yes	Bone health, Prevents diabetes, Important for child health and growth	Sun	Milk and dairy products, Fish	No	I do not expose my child to the sun	Indirectly (Behind the glass, for example)	After three in the afternoon	I do not expose my child to the sun	No	Yes	Always	Forget	Yes	Yes	Yes	From time to time	Yes	Yes	Yes	Yes	Always	Sometimes	Permanently	Yes	Yes	No	less than an hour	Face and hands	After three o'clock in the evening	No	Never use sunscreen	I do not know
2022-08-09 13:07:20	24	Married	Bachelor	Unemployed	Non-Saudi	One child	22	Rented house	Less than 5,000 riyals per month	Breast feeding	Yes	Doctor/Nurse	I don't know	Bone health	Sun	Vegetables	No	Feet and legs	Directly	Before ten in the morning	From one to two hours	Yes	Yes	Always	Forget	Yes	Yes	Yes	From time to time	Yes	Yes	No	Yes	Sometimes	Sometimes	Permanently	Yes	Yes	No	From one to two hours	Face, hands, and legs	Before ten in the morning	No	Never use sunscreen	I do not know
2022-09-20 19:33:03	27	Married	Bachelor	Unemployed	Saudi	One child	22	Rented house	From 5 - less than 10000 riyals per month	Bottle feeding	Yes	Friends – family	I don't know	Bone health, Boosts immunity, Helps healthy pregnancy, Prevents stroke, Prevents diabetes, Prevents high blood pressure, Prevents arthritis, Prevents depression, Important for hair health, Prevents obesity and weight gain, Important for skin health, Important for child health and growth, أخرى, ارجو ذكرها	Sun, Food supplements	Milk and dairy products, Fruits, Vegetables, Fish, Yolk	Yes	All the body	Indirectly (Behind the glass, for example)	After three in the afternoon	From one to two hours	No	No	Sometimes	Forget, Because the child gets a dose of vitamin D from formula or Cereal,Other reasons (The child does not need vitamin D)	Yes	Yes	Yes	From time to time	Yes	Yes	No	No	Sometimes	Scarcely	Scarcely	No	Sometimes	No	less than an hour	Face, hands, and legs	From ten to three in the evening	No	Never use sunscreen	I do not know
2022-08-12 00:51:53	44	Married	High school	Unemployed	Saudi	Four children and more	22	Owing house	From 5 - less than 10000 riyals per month	Bottle feeding	Yes	Social media (Snapchat, Instagram, Facebook...)	Yes	Bone health, Boosts immunity, Prevents arthritis, Prevents depression, Important for hair health, Prevents obesity and weight gain	Sun	Fish	No	I do not expose my child to the sun	Indirectly (Behind the glass, for example)	After three in the afternoon	Less than an hour	No	Yes	Scarcely	Forget	No	No	Yes	Periodically	Yes	Yes	Yes	No	Sometimes	Sometimes	Scarcely	Yes	Sometimes	Yes	less than an hour	Face, hands, and legs	After three o'clock in the evening	No	Never use sunscreen	I do not know
2022-09-24 14:59:57	25	Married	Bachelor	Unemployed	Saudi	Two children	24	Owing house	From 5 - less than 10000 riyals per month	Bottle feeding	Yes	Doctor/Nurse	I don't know	Bone health, Boosts immunity	Sun, Food	Milk and dairy products, Fruits, Yolk	No	I do not expose my child to the sun	Directly	I do not expose my child to the sun	I do not expose my child to the sun	No	Yes	Scarcely	Forget	Yes	Yes	Yes	At the request of the doctor	Yes	No	No	No	never	never	Permanently	Yes	No	No	less than an hour		Before ten in the morning	Sometimes	Scarcely	I do not know
2022-08-29 14:49:17	26	Married	High school	Unemployed	Saudi	Three kids	24	Owing house	From 5 - less than 10000 riyals per month	Bottle feeding	Yes	Doctor/Nurse	Yes	Bone health, Boosts immunity, Helps healthy pregnancy, Prevents arthritis, Prevents depression, Important for hair health, Important for child health and growth	Sun	Milk and dairy products, Vegetables, Fish, Yolk, Liver	Yes	All the body	Directly	Other times	Less than an hour	No	Yes	Sometimes	Forget	Yes	Yes	Yes	Periodically	Yes	Yes	No	No	never	never	Permanently	Yes	Sometimes	No	less than an hour	Face, hands, and legs	After three o'clock in the evening	Yes	Sometimes	I do not know
2022-08-29 14:16:33	27	Married	High school	Unemployed	Saudi	One child	24	Rented house	Less than 5,000 riyals per month	Bottle feeding	Yes	From studying at school/university	Yes	Bone health, Prevents depression, Important for child health and growth	Food supplements	Milk and dairy products, Fish, Liver	No	All the body	Indirectly (Behind the glass, for example)	Before ten in the morning	Less than an hour	No	No	Do not apply	Because I expose it to the sun, there is no need to take vitamin D doses	Yes	Yes	Yes	From time to time	No	Yes	Yes	No	never	never	Scarcely	Yes	Sometimes	No	less than an hour	Face and hands	Before ten in the morning	No	Never use sunscreen	No
2022-09-20 13:26:58	27	Married	Secondary	Unemployed	Non-Saudi	Four children and more	24	Rented house	From 5 - less than 10000 riyals per month	Both	Yes	Doctor/Nurse	Yes	Bone health, Helps healthy pregnancy, Prevents diabetes, Important for child health and growth	Sun, Food, Food supplements	Fish	Yes	Feet and legs	Indirectly (Behind the glass, for example)	Before ten in the morning	From one to two hours	Yes	Yes	Always		Yes	Yes	Yes	From time to time	Yes	Yes	No	Yes	Scarcely	Sometimes	Always	Yes	Yes	No	From one to two hours	Face, hands, and legs	Before ten in the morning	No	Scarcely	I do not know
2022-07-31 21:07:54	28	Married	Bachelor	Employee	Non-Saudi	One child	24	Rented house	From 5 - less than 10000 riyals per month	Both	Yes	Social media (Snapchat, Instagram, Facebook...)	I don't know	Bone health, Prevents arthritis, Prevents depression, Important for child health and growth	Sun	Yolk	Yes	Feet and legs	Indirectly (Behind the glass, for example)	Between 10 in the morning and 3 in the afternoon	From one to two hours	No	Yes	Sometimes	Other reasons (The child does not need vitamin D)	Yes	Yes	Yes	From time to time	Yes	Yes	Yes	No	Sometimes	Always	Sometimes	Yes	Sometimes	Yes	From one to two hours	Face and hands	From ten to three in the evening	Yes	Always	No
2022-09-13 14:25:12	28	Married	Bachelor	Employee	Non-Saudi	Two children	24	Rented house	Less than 5,000 riyals per month	Bottle feeding	Yes	Doctor/Nurse	Yes	Bone health	Sun	Milk and dairy products	No	Face only	Indirectly (Behind the glass, for example)	Other times	I do not expose my child to the sun	No	No	Do not apply	Because the mother is busy with the job	Yes	No	Yes	At the request of the doctor	Yes	Yes	Yes	No	Sometimes	never	Scarcely	Yes	Yes	Yes	less than an hour	Face and hands	From ten to three in the evening	No	Never use sunscreen	No
2022-09-20 19:27:31	30	Married	Bachelor	Unemployed	Saudi	Three kids	24	Owing house	From 10-20 thousand riyals per month	Both	Yes	TV, radio, advertisements, Social media (Snapchat, Instagram, Facebook...), Friends – family, Doctor/Nurse	Yes	Bone health, Prevents depression	Sun, Food, Food supplements	Milk and dairy products, Fish	No	Feet and legs	Directly	Before ten in the morning	Less than an hour	No	No	Sometimes	Forget	Yes	Yes	Yes	Periodically	Yes	Yes	No	No	Sometimes	Sometimes	Sometimes	Yes	Sometimes	No	less than an hour	Face, hands, and legs	Before ten in the morning	Sometimes	Sometimes	I do not know
2022-07-31 00:56:22	31	Married	Bachelor	Unemployed	Saudi	One child	24	Rented house	From 5 - less than 10000 riyals per month	Bottle feeding	Yes	Doctor/Nurse	I don't know	Bone health, Boosts immunity, Helps healthy pregnancy, Prevents arthritis, Prevents depression, Important for hair health, Important for child health and growth	Sun	Yolk, Liver	No	I do not expose my child to the sun	Indirectly (Behind the glass, for example)	I do not expose my child to the sun	From one to two hours	No	Yes	Sometimes	Forget	Yes	Yes	Yes	At the request of the doctor	Yes	Yes	Yes	Yes	Sometimes	Sometimes	Scarcely	Yes	Sometimes	No	From one to two hours	Face and hands	Before ten in the morning	Yes	Sometimes	No
2022-09-12 12:09:26	34	Married	Bachelor	Unemployed	Non-Saudi	Two children	24	Rented house	From 5 - less than 10000 riyals per month	Bottle feeding	Yes	Doctor/Nurse	Yes	Bone health, Boosts immunity, Prevents depression, Important for hair health, Important for skin health, Important for child health and growth	Food supplements	Fruits, Vegetables	No	Hands only	Indirectly (Behind the glass, for example)	I do not expose my child to the sun	I do not expose my child to the sun	No	No	Sometimes	Forget	Yes	Yes	Yes	From time to time	Yes	Yes	Yes	Yes	Always	Sometimes	Always	No	Yes	No	less than an hour	Face and hands	Before ten in the morning	Yes	Always	No
2022-09-11 11:51:50	35	Married	Bachelor	Unemployed	Saudi	Four children and more	24	Owing house	From 5 - less than 10000 riyals per month	Bottle feeding	Yes	TV, radio, advertisements, Social media (Snapchat, Instagram, Facebook...)	Yes	Bone health, Boosts immunity, Prevents arthritis, Prevents depression, Important for hair health, Prevents obesity and weight gain, Important for child health and growth	Sun	Milk and dairy products, Fruits, Vegetables	Yes	Feet and legs	Directly	Before ten in the morning	Less than an hour	Yes	Yes	Sometimes	Because I expose it to the sun, there is no need to take vitamin D doses, Because the child gets a dose of vitamin D from formula or Cereal	Yes	Yes	Yes	From time to time	Yes	No	No	No	Always	Sometimes	Permanently	Yes	Yes	Yes	less than an hour	Face, hands, and legs	Before ten in the morning	No	Sometimes	No
2022-09-20 13:49:07	35	Married	High school	Unemployed	Non-Saudi	Four children and more	24	Rented house	Less than 5,000 riyals per month	Bottle feeding	Yes	TV, radio, advertisements, Social media (Snapchat, Instagram, Facebook...), Doctor/Nurse	Yes	Bone health, Boosts immunity, Helps healthy pregnancy, Prevents stroke, Prevents arthritis	Sun, Food, Food supplements	Milk and dairy products, Fruits, Vegetables	Yes	Feet and legs	Indirectly (Behind the glass, for example)	Between 10 in the morning and 3 in the afternoon	Less than an hour	Yes	Yes	Always	Forget	Yes	Yes	Yes	Periodically	Yes	Yes	No	Yes	Always	Always	Sometimes	Yes	Yes	Yes	less than an hour	Face, hands, and legs	From ten to three in the evening	No	Never use sunscreen	No
2022-09-20 15:48:32	37	Married	Secondary	Unemployed	Saudi	Four children and more	24	Owing house	Less than 5,000 riyals per month	Bottle feeding	Yes	TV, radio, advertisements, Doctor/Nurse	Yes	Bone health, Boosts immunity, Helps healthy pregnancy, Prevents arthritis, Prevents depression, Important for hair health, Important for skin health, Important for child health and growth	Sun, Food, Food supplements	Milk and dairy products, Fruits, Vegetables, Fish, Yolk	Yes	Feet and legs	Directly	Before ten in the morning	Less than an hour	Yes	Yes	Sometimes	Forget	Yes	Yes	Yes	From time to time	Yes	Yes	No	Yes	Sometimes	Always	Scarcely	Yes	Yes	Yes	less than an hour	Face, hands, and legs	Before ten in the morning	No	Scarcely	Yes
2022-09-11 11:55:12	38	Married	Bachelor	Employee	Saudi	Four children and more	24	Owing house	From 5 - less than 10000 riyals per month	Both	Yes	TV, radio, advertisements	I don't know	Important for child health and growth	Sun	Yolk	Yes	Feet and legs	Directly	Before ten in the morning	From one to two hours	No	No	Sometimes	Because I expose it to the sun, there is no need to take vitamin D doses	No	Yes	Yes	Periodically	Yes	Yes	Yes	No	Scarcely	Scarcely	Sometimes	Yes	Yes	Yes	less than an hour	Face, hands, and legs	Before ten in the morning	Yes	Always	Yes
2022-08-01 14:05:57	40	Married	Bachelor	Employee	Saudi	Four children and more	24	Rented house	From 10-20 thousand riyals per month	Bottle feeding	Yes	From studying at school/university	Yes	Boosts immunity, Prevents arthritis, Prevents depression, Important for child health and growth	Sun	Fish, Liver	Yes	All the body	Directly	Between 10 in the morning and 3 in the afternoon	From one to two hours	Yes	Yes	Always	Because the mother is busy with the job	Yes	Yes	Yes	Periodically	Yes	Yes	No	Yes	Sometimes	Sometimes	Scarcely	Yes	Yes	Yes	less than an hour	Face, hands, and legs	From ten to three in the evening	No	Sometimes	No
2022-08-29 13:38:40	25	Married	High school	Unemployed	Saudi	Two children	25	Rented house	Less than 5,000 riyals per month	Bottle feeding	Yes	Social media (Snapchat, Instagram, Facebook...)	I don't know	Bone health	Sun	Milk and dairy products	No	All the body	Indirectly (Behind the glass, for example)	After three in the afternoon	Less than an hour	No	No	Do not apply	Forget	Yes	Yes	Yes	Periodically	No	Yes	No	No	Sometimes	Sometimes	Scarcely	Yes	Yes	No	From one to two hours	Face and hands	Before ten in the morning	No	Sometimes	No
2022-08-29 13:40:12	30	Married	High school	Unemployed	Saudi	Four children and more	25	Owing house	From 10-20 thousand riyals per month	Both	Yes	Doctor/Nurse	Yes	Bone health, Boosts immunity, Important for child health and growth	Sun	I don't know	No	All the body	Directly	Before ten in the morning	From one to two hours	Yes	Yes	Always	Other reasons (The child does not need vitamin D)	Yes	Yes	Yes	Periodically	Yes	No	No	No	Sometimes	Sometimes	Sometimes	Yes	Sometimes	No	From one to two hours	Face, hands, and legs	Before ten in the morning	Yes	Always	No
2022-08-02 04:54:41	31	Married	Bachelor	Employee	Non-Saudi	Two children	26	Owing house	Less than 5,000 riyals per month	Both	Yes	Doctor/Nurse	Yes	Bone health, Important for hair health, Important for skin health, Important for child health and growth	Sun	Yolk	No	I do not expose my child to the sun	Indirectly (Behind the glass, for example)	I do not expose my child to the sun	Less than an hour	No	No	Do not apply	Forget	Yes	Yes	Yes	From time to time	Yes	Yes	No	No	Sometimes	Sometimes	Permanently	Yes	Yes	No	less than an hour	Face and hands	From ten to three in the evening	No	Never use sunscreen	No
2022-09-29 07:29:13	34	Married	Bachelor	Unemployed	Non-Saudi	Four children and more	26	Rented house	From 5 - less than 10000 riyals per month	Bottle feeding	No	Social media (Snapchat, Instagram, Facebook...)	I don't know	Bone health, Important for skin health	Sun, Food	Fish	Yes	All the body	Indirectly (Behind the glass, for example)	Between 10 in the morning and 3 in the afternoon	From one to two hours	No	No	Do not apply	Because I expose it to the sun, there is no need to take vitamin D doses, Because the child gets a dose of vitamin D from formula or Cereal	Yes	Yes	Yes	At the request of the doctor	Yes	Yes	No	No	never	never	Permanently	Yes	Sometimes	No	From one to two hours	Face and hands	From ten to three in the evening	Sometimes	Sometimes	No
2022-08-07 19:52:34	37	Married	Master and above	Employee	Saudi	Three kids	26	Rented house	From 10-20 thousand riyals per month	Bottle feeding	Yes	TV, radio, advertisements, Social media (Snapchat, Instagram, Facebook...), From studying at school/university	Yes	Bone health, Helps healthy pregnancy, Prevents arthritis, Prevents depression, Important for hair health, Prevents obesity and weight gain, Important for child health and growth	Sun	Milk and dairy products, Fish, Yolk	No	All the body	Directly	Between 10 in the morning and 3 in the afternoon	From one to two hours	Yes	Yes	Sometimes	Forget	Yes	Yes	Yes	From time to time	Yes	Yes	No	No	Sometimes	Sometimes	Permanently	Yes	Sometimes	No	less than an hour	Face and hands	From ten to three in the evening	No	Scarcely	I do not know
2022-09-17 23:27:34	33	Married	Bachelor	Employee	Saudi	Two children	27	Owing house	Less than 5,000 riyals per month	Bottle feeding	Yes	Doctor/Nurse	I don't know	Bone health, Boosts immunity, Helps healthy pregnancy, Prevents stroke, Prevents diabetes, Prevents high blood pressure, Prevents arthritis, Prevents depression, Important for hair health, Prevents obesity and weight gain, Important for skin health, Important for child health and growth	Sun, Food, Food supplements	Milk and dairy products, Fruits, Vegetables, Fish, Yolk, Liver	Yes	All the body	Directly	Between 10 in the morning and 3 in the afternoon	Less than an hour	No	No	Do not apply	Because I expose it to the sun, there is no need to take vitamin D doses	No	No	Yes	From time to time	No	Yes	No	No	never	never	Permanently	Yes	Sometimes	No	less than an hour	Face, hands, and legs	From ten to three in the evening	Sometimes	Never use sunscreen	I do not know
2022-08-18 07:02:33	34	Married	Bachelor	Unemployed	Saudi	Two children	27	Rented house	Less than 5,000 riyals per month	Bottle feeding	Yes	From studying at school/university, Doctor/Nurse	Yes	Bone health, Boosts immunity, Helps healthy pregnancy, Prevents arthritis, Prevents depression, Important for hair health, Prevents obesity and weight gain, Important for child health and growth	Sun	Milk and dairy products, Vegetables, Fish, Yolk	Yes	All the body	Directly	After three in the afternoon	From one to two hours	Yes	Yes	Always	Forget,Other reasons (The child does not need vitamin D)	Yes	Yes	Yes	Periodically	Yes	No	No	Yes	Sometimes	Sometimes	Permanently	Yes	Yes	Yes	From one to two hours	Face, hands, and legs	Before ten in the morning	Yes	Always	No
2022-07-31 11:09:37	38	Married	High school	Unemployed	Saudi	Four children and more	28	Rented house	Less than 5,000 riyals per month	Breast feeding	Yes	TV, radio, advertisements, Social media (Snapchat, Instagram, Facebook...)	Yes	Bone health, Boosts immunity, Helps healthy pregnancy, Prevents arthritis, Prevents depression, Important for hair health, Prevents obesity and weight gain, Important for child health and growth	Sun	Milk and dairy products, Yolk, Liver	Yes	Feet and legs	Directly	After three in the afternoon	From one to two hours	No	Yes	Sometimes	Forget, Mother's preoccupation with other children	No	Yes	Yes	From time to time	Yes	Yes	Yes	No	never	never	Sometimes	Yes	Yes	No	From one to two hours	Face, hands, and legs	After three o'clock in the evening	No	Scarcely	No
2022-09-13 19:14:43	45	Married	Bachelor	Employee	Saudi	Four children and more	28	Owing house	More than 20 thousand riyals per month	Both	Yes	Other	I don't know	Bone health, Boosts immunity, Helps healthy pregnancy, Prevents arthritis, Prevents depression, Important for hair health, Prevents obesity and weight gain, Important for child health and growth	Sun	Milk and dairy products, Fish, Yolk, Liver	No	Feet and legs	Directly	After three in the afternoon	From one to two hours	No	No	Do not apply	Other reasons (The child does not need vitamin D)	Yes	Yes	Yes	Periodically	No	Yes	No	Yes	Scarcely	Sometimes	Permanently	Yes	Yes	No	less than an hour	Face, hands, and legs	After three o'clock in the evening	No	Never use sunscreen	I do not know
2022-09-13 17:09:30	28	Married	Bachelor	Unemployed	Non-Saudi	One child	29	Owing house	From 5 - less than 10000 riyals per month	Bottle feeding	Yes	Doctor/Nurse	I don't know	I don't know	I don't know	I don't know	Yes	All the body	Indirectly (Behind the glass, for example)	Between 10 in the morning and 3 in the afternoon	6 hours and more	No	No	Do not apply	Other reasons (The child does not need vitamin D)	No	Yes	Yes	Periodically	Yes	Yes	Yes	Yes	Always	never	Permanently	Yes	Sometimes	No	6 hours and more	Face only	Before ten in the morning	Yes	Always	No
2022-09-24 14:22:06	38	Married	Master and above	Employee	Non-Saudi	Two children	29	Rented house	From 10-20 thousand riyals per month	Both	Yes	Doctor/Nurse	Yes	Bone health, Boosts immunity, Helps healthy pregnancy, Prevents arthritis, Prevents depression, Important for hair health, Prevents obesity and weight gain, Important for skin health, Important for child health and growth	Sun, Food, Food supplements	Milk and dairy products, Vegetables, Fish	Yes	Feet and legs	Directly	Before ten in the morning	From one to two hours	Yes	Yes	Always		Yes	Yes	Yes	At the request of the doctor	Yes	Yes	Yes	Yes	Always	Always	Permanently	No	No	No	From one to two hours	Face and hands	Before ten in the morning	No	Scarcely	I do not know
2022-08-01 13:48:31	39	Married	Bachelor	Employee	Saudi	Two children	29	Owing house	From 10-20 thousand riyals per month	Bottle feeding	Yes	Friends – family	I don't know	Bone health, Boosts immunity, Helps healthy pregnancy, Prevents arthritis, Important for child health and growth	Sun	Milk and dairy products, Fish, Yolk, Liver	No	Feet and legs	Indirectly (Behind the glass, for example)	Before ten in the morning	Less than an hour	No	Yes	Sometimes	Forget, Because the child gets a dose of vitamin D from formula or Cereal, Because the mother is busy with the job	Yes	Yes	Yes	From time to time	No	Yes	Yes	No	never	never	Permanently	Yes	Sometimes	No	less than an hour	Face and hands	Before ten in the morning	Yes	Sometimes	No
2022-08-29 13:46:07	25	Married	High school	Unemployed	Saudi	Two children	30	Rented house	From 5 - less than 10000 riyals per month	Bottle feeding	Yes	Friends – family	I don't know	Bone health	Sun	Milk and dairy products, Fish, Yolk	Yes	All the body	Directly	Before ten in the morning	6 hours and more	No	No	Scarcely	Because vitamin D doses are not necessary	Yes	Yes	Yes	Periodically	Yes	Yes	Yes	No	Sometimes	never	Sometimes	Yes	Sometimes	No	From one to two hours	Face, hands, and legs	After three o'clock in the evening	Yes	Sometimes	No
2022-09-12 22:32:40	34	Married	Bachelor	Employee	Non-Saudi	Three kids	30	Owing house	Less than 5,000 riyals per month	Both	Yes	From studying at school/university, Doctor/Nurse	I don't know	Bone health, Important for hair health, Prevents obesity and weight gain, Important for child health and growth	Sun	Milk and dairy products, Fish, Yolk	Yes	All the body	Directly	Before ten in the morning	From one to two hours	No	No	Scarcely	Forget, Because the mother is busy with the job, Mother's preoccupation with other children	Yes	Yes	Yes	From time to time	Yes	Yes	No	No	Sometimes	never	Permanently	Yes	Sometimes	Yes	6 hours and more	Face and hands	Before ten in the morning	Yes	Always	I do not know
2022-08-11 19:46:22	30	Married	Bachelor	Unemployed	Saudi	One child	31	Rented house	Less than 5,000 riyals per month	Both	Yes	Friends – family	Yes	Important for child health and growth	Sun	I don't know	No	All the body	Directly	After three in the afternoon	Less than an hour	No	Yes	Always	Other reasons (The child does not need vitamin D)	Yes	Yes	Yes	Periodically	Yes	Yes	No	No	never	never	Scarcely	Yes	No	No	less than an hour	Face, hands, and legs	After three o'clock in the evening	No	Never use sunscreen	I do not know
2022-09-13 14:52:16	31	Married	Bachelor	Unemployed	Non-Saudi	Two children	31	Rented house	Less than 5,000 riyals per month	Bottle feeding	Yes	Doctor/Nurse	No	Bone health, Boosts immunity, Prevents depression, Important for child health and growth, لا أعرف	Sun	Milk and dairy products, Vegetables	Yes	Feet and legs	Directly	Before ten in the morning	Less than an hour	Yes	Yes	Always	Other reasons (The child does not need vitamin D)	Yes	Yes	Yes	From time to time	Yes	Yes	No	No	Scarcely	never	Always	Yes	Yes	No	less than an hour	Face and hands	After three o'clock in the evening	Sometimes	Sometimes	I do not know
2022-09-19 18:02:18	25	Married	High school	Unemployed	Non-Saudi	Two children	33	Rented house	Less than 5,000 riyals per month		Yes	Friends – family, From studying at school/university, Doctor/Nurse		Bone health, Boosts immunity, Important for child health and growth	Sun, Food	Milk and dairy products, Fish, Yolk, Liver	No	I do not expose my child to the sun	Indirectly (Behind the glass, for example)	After three in the afternoon	Less than an hour	No	Yes	Sometimes	Other reasons (The child does not need vitamin D)	Yes	Yes	Yes	From time to time	Yes	No	Yes	No	Sometimes	Sometimes	Sometimes	No	Sometimes	No	less than an hour	Face and hands	After three o'clock in the evening	Sometimes	Scarcely	I do not know
2022-09-13 12:39:19	37	Married	Bachelor	Unemployed	Non-Saudi	Four children and more	33	Rented house	Less than 5,000 riyals per month	Bottle feeding	Yes	From studying at school/university	Yes	Prevents arthritis	Sun	Milk and dairy products, Fruits, Yolk, Liver	No	I do not expose my child to the sun	Indirectly (Behind the glass, for example)	I do not expose my child to the sun	I do not expose my child to the sun	No	No	Do not apply	Other reasons (The child does not need vitamin D)	No	No	Yes	At the request of the doctor	Yes	No	No	No	Scarcely	never	Permanently	Yes	Sometimes	No	less than an hour	Face and hands	From ten to three in the evening	No	Never use sunscreen	I do not know
2022-08-12 01:01:32	28	Married	Bachelor	Unemployed	Saudi	Two children	34	Owing house	From 10-20 thousand riyals per month	Bottle feeding	Yes	Doctor/Nurse	I don't know	Prevents depression, Important for hair health, Important for skin health, Important for child health and growth	Sun	Fish	No	I do not expose my child to the sun	Indirectly (Behind the glass, for example)	I do not expose my child to the sun	From one to two hours	No	No	Do not apply	Because vitamin D doses are not necessary	Yes	Yes	Yes	At the request of the doctor	Yes	No	No	Yes	Sometimes	Sometimes	Permanently	Yes	No	No	less than an hour	Face and hands	From ten to three in the evening	No	Sometimes	I do not know
2022-09-12 22:38:45	34	Married	Bachelor	Unemployed	Non-Saudi	Three kids	34	Owing house	From 10-20 thousand riyals per month	Bottle feeding	Yes	Doctor/Nurse	Yes	Bone health, Boosts immunity, Prevents arthritis, Important for hair health, Important for skin health, Important for child health and growth	Sun	Milk and dairy products	No	Feet and legs	Indirectly (Behind the glass, for example)	Before ten in the morning	From one to two hours	No	Yes	Sometimes	Forget	Yes	Yes	Yes	Periodically	Yes	No	No	Yes	Always	Sometimes	Scarcely	No	Yes	No	From one to two hours	Face and hands	After three o'clock in the evening	Yes	Always	No
2022-09-24 14:31:19	28	Married	Bachelor	Employee	Saudi	Three kids	36	Rented house	From 5 - less than 10000 riyals per month	Breast feeding	Yes	Social media (Snapchat, Instagram, Facebook...), Magazines, Books, From studying at school/university, Doctor/Nurse	Yes	Bone health, Boosts immunity, Helps healthy pregnancy, Prevents stroke, Prevents diabetes, Prevents high blood pressure, Prevents arthritis, Prevents depression, Important for hair health, Prevents obesity and weight gain, Important for skin health, Important for child health and growth	Sun, Food	Milk and dairy products, Fish, Yolk, Liver	Yes	All the body	Directly	After three in the afternoon	From one to two hours	Yes	No	Do not apply	Other reasons (The child does not need vitamin D)	No	No	No	At the request of the doctor	No	Yes	No	No	never	never	Permanently	Yes	Yes	Yes	From one to two hours	Face and hands	Before ten in the morning	No	Sometimes	Yes
2022-09-12 15:29:37	29	Married	Bachelor	Unemployed	Non-Saudi	Two children	36	Rented house	Less than 5,000 riyals per month	Bottle feeding	Yes	Social media (Snapchat, Instagram, Facebook...), From studying at school/university	I don't know	Bone health, Important for hair health	Food	Milk and dairy products	No	I do not expose my child to the sun	Indirectly (Behind the glass, for example)	I do not expose my child to the sun	I do not expose my child to the sun	No	No	Do not apply	Mother's preoccupation with other children,Other reasons (The child does not need vitamin D)	Yes	Yes	Yes	At the request of the doctor	Yes	Yes	No	Yes	never	never	Scarcely	No	Sometimes	No	less than an hour	Face only	Before ten in the morning	No	Never use sunscreen	I do not know
2022-09-19 19:02:14	29	Married	High school	Employee	Saudi	Three kids	36	Rented house	From 5 - less than 10000 riyals per month	Bottle feeding	Yes	Social media (Snapchat, Instagram, Facebook...), From studying at school/university, Doctor/Nurse	Yes	Bone health, Boosts immunity, Helps healthy pregnancy, Prevents arthritis, Prevents depression, Important for hair health, Prevents obesity and weight gain, Important for skin health, Important for child health and growth	Sun, Food, Food supplements	Milk and dairy products, Fruits, Vegetables, Fish, Yolk	Yes	All the body	Directly	Between 10 in the morning and 3 in the afternoon	Less than an hour	Yes	Yes	Sometimes	Because I expose it to the sun, there is no need to take vitamin D doses	Yes	Yes	Yes	At the request of the doctor	No	No	No	No	Sometimes	Sometimes	Always	Yes	Yes	Yes	less than an hour	Face and hands	After three o'clock in the evening	No	Scarcely	I do not know
2022-07-31 10:29:59	30	Married	Master and above	Employee	Saudi	One child	36	Owing house	From 5 - less than 10000 riyals per month	Bottle feeding	Yes	TV, radio, advertisements, Social media (Snapchat, Instagram, Facebook...), Friends – family, Magazines, Books, From studying at school/university, Doctor/Nurse	Yes	Bone health, Boosts immunity, Helps healthy pregnancy, Prevents stroke, Prevents diabetes, Prevents high blood pressure, Prevents arthritis, Prevents depression, Important for hair health, Prevents obesity and weight gain, Important for skin health, Important for child health and growth	Food	Milk and dairy products, Fruits, Vegetables, Fish, Yolk, Liver	Yes	Feet and legs	Indirectly (Behind the glass, for example)	Before ten in the morning	Less than an hour	No	Yes	Always	Other reasons (The child does not need vitamin D)	Yes	Yes	Yes	Periodically	Yes	Yes	Yes	Yes	never	Sometimes	Permanently	Yes	Yes	Yes	6 hours and more	Face and hands	Before ten in the morning	Yes	Always	No
2022-08-09 20:27:06	30	Married	Bachelor	Unemployed	Non-Saudi	Two children	36	Rented house	From 5 - less than 10000 riyals per month	Breast feeding	Yes	Social media (Snapchat, Instagram, Facebook...), Friends – family, Doctor/Nurse	I don't know	Bone health, Boosts immunity, Helps healthy pregnancy, Prevents depression, Important for hair health, Important for child health and growth	Sun	Fruits, Vegetables	Yes	Feet and legs	Indirectly (Behind the glass, for example)	Before ten in the morning	Less than an hour	No	Yes	Sometimes	Other reasons (The child does not need vitamin D)	Yes	Yes	Yes	From time to time	Yes	Yes	Yes	Yes	Sometimes	Sometimes	Scarcely	Yes	No	Yes	less than an hour	Face and hands	Before ten in the morning	No	Sometimes	I do not know
2022-08-18 23:29:45	30	Married	Bachelor	Unemployed	Saudi	Three kids	36	Rented house	Less than 5,000 riyals per month	Both	Yes	Doctor/Nurse	Yes	Bone health, Helps healthy pregnancy, Prevents arthritis, Prevents depression, Important for hair health, Important for child health and growth	Sun	Liver	No	All the body	Indirectly (Behind the glass, for example)	Before ten in the morning	Less than an hour	No	Yes	Sometimes	Because the child gets a dose of vitamin D from formula or Cereal	No	Yes	Yes	From time to time	Yes	Yes	No	Yes	never	Sometimes	Sometimes	Yes	No	No	less than an hour	Face and hands	Before ten in the morning	Yes	Scarcely	I do not know
2022-09-12 20:09:13	30	Married	Master and above	Employee	Saudi	One child	36	Rented house	From 5 - less than 10000 riyals per month	Both	Yes	TV, radio, advertisements, Social media (Snapchat, Instagram, Facebook...), Friends – family, Magazines, Books, From studying at school/university, Doctor/Nurse	Yes	Bone health, Boosts immunity, Helps healthy pregnancy, Prevents stroke, Prevents diabetes, Prevents high blood pressure, Prevents arthritis, Prevents depression, Important for hair health, Prevents obesity and weight gain, Important for skin health, Important for child health and growth	Sun	Milk and dairy products, Fruits, Vegetables, Fish, Yolk, Liver	Yes	Hands only	Indirectly (Behind the glass, for example)	Before ten in the morning	From one to two hours	No	No	Do not apply	Other reasons (The child does not need vitamin D)	Yes	Yes	Yes	Periodically	Yes	Yes	Yes	No	Scarcely	never	Permanently	Yes	Yes	Yes	From one to two hours	Face and hands	Before ten in the morning	Yes	Always	I do not know
2022-09-18 00:02:52	30	Married	Bachelor	Employee	Saudi	One child	36	Owing house	More than 20 thousand riyals per month	Breast feeding	Yes	Social media (Snapchat, Instagram, Facebook...), From studying at school/university	Yes	Bone health, Boosts immunity, Prevents depression, Important for child health and growth	Sun	Fish	No	I do not expose my child to the sun	Indirectly (Behind the glass, for example)	I do not expose my child to the sun	I do not expose my child to the sun	No	Yes	Sometimes	Forget	Yes	Yes	Yes	Periodically	Yes	Yes	Yes	No	Sometimes	Sometimes	Sometimes	Yes	Sometimes	No	less than an hour	Face and hands	Before ten in the morning	Sometimes	Sometimes	No
2022-08-11 21:21:38	32	Married	Bachelor	Unemployed	Saudi	Two children	36	Rented house	From 5 - less than 10000 riyals per month	Bottle feeding	Yes	Social media (Snapchat, Instagram, Facebook...), Friends – family, Doctor/Nurse	I don't know	Bone health, Boosts immunity, Prevents arthritis, Important for child health and growth	Sun	Milk and dairy products, Vegetables, Fish, Yolk	No	All the body	Indirectly (Behind the glass, for example)	Before ten in the morning	Less than an hour	Yes	No	Sometimes	Forget, Because the child gets a dose of vitamin D from formula or Cereal	Yes	Yes	Yes	From time to time	Yes	Yes	No	Yes	Sometimes	Sometimes	Always	Yes	Sometimes	No	less than an hour	Face and hands	Before ten in the morning	Yes	Sometimes	No
2022-08-18 07:08:29	33	Married	Bachelor	Employee	Saudi	Two children	36	Owing house	From 5 - less than 10000 riyals per month	Breast feeding	Yes	Doctor/Nurse	I don't know	Bone health, Boosts immunity, Prevents depression, Important for hair health, Important for child health and growth	Sun	Milk and dairy products, Fish, Yolk	Yes	All the body	Directly	Before ten in the morning	Less than an hour	No	Yes	Sometimes	Because I expose it to the sun, there is no need to take vitamin D doses, Because the child gets a dose of vitamin D from formula or Cereal	Yes	Yes	Yes	From time to time	Yes	Yes	No	No	Scarcely	Sometimes	Sometimes	Yes	Yes	No	less than an hour	Face, hands, and legs	Before ten in the morning	Yes	Sometimes	No
2022-09-12 19:58:21	38	Married	Master and above	Employee	Saudi	Four children and more	36	Owing house	From 5 - less than 10000 riyals per month	Bottle feeding	Yes	TV, radio, advertisements, Social media (Snapchat, Instagram, Facebook...), Magazines, Books, From studying at school/university, Doctor/Nurse	Yes	Bone health, Prevents depression, Important for child health and growth	Sun	Milk and dairy products, Fruits, Vegetables	Yes	Feet and legs	Directly	Before ten in the morning	6 hours and more	Yes	Yes	Scarcely	Because I expose it to the sun, there is no need to take vitamin D doses, Because the child gets a dose of vitamin D from formula or Cereal, Because the mother is busy with the job	Yes	Yes	Yes	Periodically	Yes	Yes	Yes	No	Sometimes	Sometimes	Sometimes	Yes	Sometimes	Yes	From one to two hours	Face, hands, and legs	Before ten in the morning	Yes	Always	I do not know
2022-08-18 16:26:58	40	Married	Secondary	Unemployed	Saudi	Three kids	36	Owing house	Less than 5,000 riyals per month	Bottle feeding	Yes	Magazines, Books	Yes	Bone health, Prevents stroke, Prevents diabetes, Prevents high blood pressure, Prevents depression, Important for hair health, Prevents obesity and weight gain, Important for skin health, Important for child health and growth	Sun	Fish, Yolk, Liver	No	Feet and legs	Directly	Before ten in the morning	I do not expose my child to the sun	No	No	Do not apply	Forget	Yes	Yes	Yes	At the request of the doctor	Yes	Yes	No	No	never	never	Permanently	Yes	No	No	From one to two hours	Face, hands, and legs	Before ten in the morning	No	Never use sunscreen	I do not know
2022-08-02 23:02:36	30	Married	High school	Unemployed	Saudi	Four children and more	38	Owing house	From 10-20 thousand riyals per month	Bottle feeding	Yes	Doctor/Nurse, Other	I don't know	Bone health, Prevents depression, Important for hair health, Prevents obesity and weight gain, Important for child health and growth	Sun	I don't know	Yes	Feet and legs	Indirectly (Behind the glass, for example)	Before ten in the morning	From one to two hours	No	Yes	Always	Other reasons (The child does not need vitamin D)	Yes	Yes	Yes	Periodically	Yes	Yes	Yes	Yes	Sometimes	Always	Permanently	No	No	No	less than an hour	Face, hands, and legs	Before ten in the morning	Yes	Scarcely	I do not know
2022-09-19 18:54:44	26	Married	Bachelor	Unemployed	Saudi	One child	39	Rented house	Less than 5,000 riyals per month		Yes	Friends – family, From studying at school/university	I don't know	Bone health, Boosts immunity, Prevents arthritis, Prevents depression, Important for hair health, Important for child health and growth	Sun	Liver	No	I do not expose my child to the sun	Indirectly (Behind the glass, for example)	I do not expose my child to the sun	Less than an hour	No	Yes	Sometimes	Forget	Yes	Yes	Yes	From time to time	Yes	Yes		No	never	Scarcely	Scarcely	Yes	Sometimes	No	less than an hour	Face and hands	Before ten in the morning	Yes	Always	Yes
2022-08-11 20:26:25	33	Married	Bachelor	Employee	Saudi	Two children	39	Owing house	From 10-20 thousand riyals per month	Bottle feeding	Yes	Social media (Snapchat, Instagram, Facebook...), Friends – family, From studying at school/university, Doctor/Nurse	I don't know	Bone health, Boosts immunity, Prevents depression, Important for hair health, Prevents obesity and weight gain, Important for skin health, Important for child health and growth	Sun	Fish	No	I do not expose my child to the sun	Indirectly (Behind the glass, for example)	I do not expose my child to the sun	I do not expose my child to the sun	No	Yes	Scarcely	Forget, Because the mother is busy with the job	Yes	Yes	Yes	Periodically	Yes	Yes	Yes	No	Scarcely	never	Scarcely	Yes	Sometimes	No	From one to two hours	Face and hands	After three o'clock in the evening	Yes	Scarcely	I do not know
2022-08-29 13:42:31	35	Married	High school	Unemployed	Saudi	Three kids	39	Owing house	From 10-20 thousand riyals per month	Bottle feeding	Yes	Social media (Snapchat, Instagram, Facebook...), Friends – family, Doctor/Nurse	Yes	Bone health, Boosts immunity, Prevents diabetes, Prevents high blood pressure, Prevents arthritis, Prevents depression, Important for hair health, Prevents obesity and weight gain, Important for child health and growth	Sun	Milk and dairy products, Fruits, Vegetables, Fish, Yolk	No	Hands only	Indirectly (Behind the glass, for example)	After three in the afternoon	Less than an hour	No	No	Do not apply	Because the child gets a dose of vitamin D from formula or Cereal	Yes	No	Yes	Periodically	Yes	Yes	Yes	No	Sometimes	never	Permanently	Yes	Sometimes	No	less than an hour	Face, hands, and legs	After three o'clock in the evening	No	Never use sunscreen	No
2022-08-11 19:06:19	32	Married	Master and above	Employee	Saudi	Three kids	40	Rented house	From 10-20 thousand riyals per month	Breast feeding	Yes	From studying at school/university, Doctor/Nurse	No	Bone health, Helps healthy pregnancy, Prevents depression, Important for hair health, Prevents obesity and weight gain, Important for skin health	Food	Milk and dairy products, Fish, Yolk, Liver	No	Hands only	Directly	Before ten in the morning	From one to two hours	No	Yes	Sometimes	Forget	Yes	Yes	Yes	Periodically	Yes	Yes	Yes	Yes	Sometimes	Always	Permanently	Yes	Yes	No	From one to two hours	Face and hands	From ten to three in the evening	Yes	Always	I do not know
2022-09-20 13:22:28	35	Married	Bachelor	Unemployed	Saudi	Four children and more	40	Owing house	From 5 - less than 10000 riyals per month	Breast feeding	Yes	TV, radio, advertisements, Social media (Snapchat, Instagram, Facebook...), Friends – family, Doctor/Nurse	Yes	Bone health, Prevents arthritis, Important for hair health, Prevents obesity and weight gain, Important for skin health, Important for child health and growth	Sun, Food supplements	Milk and dairy products, Fish, Liver	Yes	All the body	Directly	Between 10 in the morning and 3 in the afternoon	6 hours and more	No	No	Do not apply	Because vitamin D doses are not necessary	Yes	Yes	Yes	Periodically	Yes	Yes	Yes	No	Always	Sometimes	Permanently	Yes	No	No	From one to two hours	Face, hands, and legs	From ten to three in the evening	Yes	Always	No
2022-09-12 12:42:09	34	Married	Bachelor	Unemployed	Non-Saudi	Two children	42	Rented house	From 10-20 thousand riyals per month	Bottle feeding	Yes	Doctor/Nurse	No	Bone health, Boosts immunity	Sun	I don't know	Yes	All the body	Directly	After three in the afternoon	From one to two hours	No	Yes	Sometimes	Forget	No	No	Yes	From time to time	Yes	Yes	No	No	never	never	Sometimes	Yes	No	Yes	From one to two hours	Face only	Before ten in the morning	Yes	Always	Yes
2022-09-12 20:36:47	36	Married	High school	Unemployed	Non-Saudi	Three kids	42	Rented house	Less than 5,000 riyals per month	Breast feeding	Yes	Friends – family	I don't know	Important for child health and growth	Sun	Milk and dairy products	No	Feet and legs	Indirectly (Behind the glass, for example)	Before ten in the morning	From one to two hours	Yes	No	Do not apply	Other reasons (The child does not need vitamin D)	Yes	Yes	Yes	Periodically	Yes	Yes	Yes	No	Sometimes	Scarcely	Permanently	Yes	Sometimes	No	6 hours and more	Face, hands, and legs	Before ten in the morning	No	Never use sunscreen	I do not know
2022-08-29 17:22:03	32	Married	Bachelor	Unemployed	Saudi	Three kids	43	Owing house	From 5 - less than 10000 riyals per month	Bottle feeding	Yes	Friends – family, Doctor/Nurse	I don't know	Bone health, Important for hair health, Prevents obesity and weight gain, Important for child health and growth	Food supplements	I don't know	No	I do not expose my child to the sun	Indirectly (Behind the glass, for example)	I do not expose my child to the sun	I do not expose my child to the sun	No	Yes	Sometimes	Forget, Mother's preoccupation with other children	Yes	Yes	Yes	From time to time	Yes	Yes	Yes	No	Sometimes	never	Permanently	Yes	Sometimes	No	less than an hour	Face and hands	Before ten in the morning	Yes	Scarcely	I do not know
2022-09-13 05:44:27	33	Married	Bachelor	Unemployed	Non-Saudi	Two children	44	Rented house	From 5 - less than 10000 riyals per month	Bottle feeding	Yes	From studying at school/university	Yes	Bone health, Boosts immunity, Important for hair health, Important for skin health, Important for child health and growth	Sun	Milk and dairy products	No	Feet and legs	Directly	Between 10 in the morning and 3 in the afternoon	From one to two hours	No	Yes	Sometimes	Forget	Yes	Yes	Yes	Periodically	Yes	Yes	No	Yes	Always	Sometimes	Sometimes	Yes	Yes	Yes	From one to two hours	Face and hands	From ten to three in the evening	Yes	Always	I do not know
2022-07-31 21:23:56	45	Married	Bachelor	Employee	Non-Saudi	One child	46	Owing house	More than 20 thousand riyals per month	Both	Yes	From studying at school/university, Doctor/Nurse	I don't know	Bone health, Boosts immunity, Important for child health and growth	Food	Milk and dairy products	Yes	All the body	Indirectly (Behind the glass, for example)	Before ten in the morning	From one to two hours	Yes	Yes	Sometimes	Because I expose it to the sun, there is no need to take vitamin D doses	Yes	Yes	Yes	Periodically	Yes	Yes	No	Yes	Sometimes	Sometimes	Sometimes	Yes	Yes	No	From one to two hours	Face and hands	Before ten in the morning	No	Sometimes	I do not know
2022-09-24 20:06:52	25	Married	Bachelor	Unemployed	Saudi	One child	48	Owing house	From 5 - less than 10000 riyals per month	Both	Yes	TV, radio, advertisements, Friends – family, From studying at school/university	Yes	Bone health, Boosts immunity, Helps healthy pregnancy, Prevents depression, Important for hair health, Important for skin health, Important for child health and growth	Sun, Food, Food supplements	Milk and dairy products, Fish, Liver	Yes	All the body	Directly	Before ten in the morning	From one to two hours	No	No	Do not apply	Because I expose it to the sun, there is no need to take vitamin D doses	Yes	Yes	Yes	Periodically	Yes	Yes	No	No	Sometimes	never	Permanently	Yes	Yes	Yes	From one to two hours	Face, hands, and legs	Before ten in the morning	No	Sometimes	I do not know
2022-08-29 13:57:20	28	Married	Secondary	Unemployed	Saudi	Three kids	48	Owing house	Less than 5,000 riyals per month	Breast feeding	Yes	Social media (Snapchat, Instagram, Facebook...), Friends – family, Doctor/Nurse	I don't know	Bone health, Boosts immunity, Important for child health and growth	Sun	Milk and dairy products, Fish, Yolk	No	All the body	Directly	Before ten in the morning	Less than an hour	No	Yes	Sometimes	Forget	Yes	Yes	Yes	From time to time	Yes	No	No	No	Sometimes	never	Permanently	Yes	No	No	less than an hour	Face and hands	Before ten in the morning	No	Never use sunscreen	I do not know
2022-09-19 17:34:12	30	Married	Bachelor	Employee	Saudi	Two children	48	Owing house	From 10-20 thousand riyals per month	Bottle feeding	Yes	Friends – family, Magazines, Books	Yes	Bone health, Helps healthy pregnancy, Prevents arthritis, Prevents depression, Important for hair health, Important for skin health	Sun, Food supplements	Milk and dairy products, Fruits, Yolk	No	I do not expose my child to the sun		I do not expose my child to the sun	I do not expose my child to the sun	No	Yes	Sometimes	Forget	Yes	Yes	Yes	Periodically	Yes	Yes	Yes	No	Always	Always		Yes	No	No	less than an hour	Face and hands	From ten to three in the evening	Sometimes	Sometimes	No
2022-09-25 07:29:33	30	Married	High school	Unemployed	Saudi	Three kids	48	Owing house	From 5 - less than 10000 riyals per month	Both	Yes	TV, radio, advertisements, Social media (Snapchat, Instagram, Facebook...), Friends – family	Yes	Bone health, Boosts immunity, Prevents depression, Important for hair health, Important for child health and growth	Sun, Food, Food supplements	Fruits, Yolk	Yes	All the body	Directly	Before ten in the morning	From one to two hours	Yes	No	Sometimes	Because I expose it to the sun, there is no need to take vitamin D doses, Mother's preoccupation with other children	Yes	Yes	Yes	From time to time	No	Yes	No	No	Always	Sometimes	Sometimes	Yes	Yes	Yes	From one to two hours	Face, hands, and legs	From ten to three in the evening	No	Sometimes	Yes
2022-08-18 08:29:07	32	Married	Bachelor	Employee	Saudi	Two children	48	Rented house	From 10-20 thousand riyals per month	Bottle feeding	Yes	Doctor/Nurse	I don't know	I don't know	Sun	I don't know	No	I do not expose my child to the sun	Indirectly (Behind the glass, for example)	I do not expose my child to the sun	I do not expose my child to the sun	No	No	Do not apply	Other reasons (The child does not need vitamin D)	No	No	Yes	Periodically	Yes	No	Yes	Yes	never	never	Permanently	Yes	No	No	less than an hour	Face and hands	From ten to three in the evening	No	Scarcely	I do not know
2022-09-19 19:11:11	32	Married	Bachelor	Unemployed	Saudi	Three kids	48	Owing house	From 10-20 thousand riyals per month	Both	Yes	Social media (Snapchat, Instagram, Facebook...), From studying at school/university, Doctor/Nurse	Yes	Bone health, Boosts immunity, Prevents arthritis, Prevents depression, Important for child health and growth	Sun, Food	Milk and dairy products, Fish, Yolk, Liver	Yes	Hands only	Directly	Between 10 in the morning and 3 in the afternoon	From one to two hours	Yes	Yes	Scarcely	Forget	No	No	Yes	From time to time	No	Yes	No	No	never	never	Permanently	Yes	Yes	Yes	From one to two hours	Face and hands	From ten to three in the evening	No	Scarcely	No
2022-09-20 15:21:04	33	Married	Bachelor	Unemployed	Saudi	Four children and more	48	Rented house	From 10-20 thousand riyals per month	Breast feeding	Yes	TV, radio, advertisements, Doctor/Nurse	Yes	Bone health, Boosts immunity, Helps healthy pregnancy, Prevents depression, Important for child health and growth	Sun, Food, Food supplements	Milk and dairy products, Fish, Yolk	Yes	All the body	Directly	After three in the afternoon	From one to two hours	Yes	No	Do not apply	Because I expose it to the sun, there is no need to take vitamin D doses,Other reasons (The child does not need vitamin D)		Yes	Yes	Periodically	Yes	Yes	No	Yes	never	never	Permanently	No	Yes	No	less than an hour	Face and hands	Before ten in the morning	No	Scarcely	No
2022-09-29 11:15:03	33	Married	High school	Unemployed	Non-Saudi	Three kids	48	Rented house	From 5 - less than 10000 riyals per month	Breast feeding	Yes	Doctor/Nurse	Yes	Boosts immunity	Sun	I don't know	No	Feet and legs	Indirectly (Behind the glass, for example)	I do not expose my child to the sun	I do not expose my child to the sun	No	No	Scarcely	Mother's preoccupation with other children	Yes	Yes	Yes	From time to time	Yes	Yes	Yes	No	never	never	Permanently	Yes	No	No	less than an hour	Face and hands	Before ten in the morning	No	Never use sunscreen	I do not know
2022-09-11 11:42:28	34	Married	Bachelor	Employee	Saudi	Two children	48	Rented house	From 5 - less than 10000 riyals per month	Bottle feeding	Yes	Social media (Snapchat, Instagram, Facebook...), Friends – family, Magazines, Books	Yes	Bone health, Boosts immunity, Helps healthy pregnancy, Prevents depression, Important for hair health, Important for skin health, Important for child health and growth	Food supplements	Milk and dairy products, Fish, Yolk	No	I do not expose my child to the sun	Indirectly (Behind the glass, for example)	After three in the afternoon	From one to two hours	No	No	Do not apply	Forget	Yes	Yes	Yes	Periodically	Yes	Yes	Yes	No	Sometimes	never	Sometimes	Yes	Yes	Yes	From one to two hours	Face and hands	After three o'clock in the evening	Yes	Sometimes	No
2022-08-18 23:23:44	38	Married	High school	Unemployed	Saudi	Four children and more	48	Owing house	From 5 - less than 10000 riyals per month	Bottle feeding	Yes	Social media (Snapchat, Instagram, Facebook...), Magazines, Books, From studying at school/university, Doctor/Nurse	Yes	Bone health, Boosts immunity, Prevents arthritis, Prevents depression, Important for hair health, Prevents obesity and weight gain, Important for skin health, Important for child health and growth	Sun	Milk and dairy products, Fish, Yolk, Liver	Yes	All the body	Directly	Before ten in the morning	Less than an hour	Yes	Yes	Sometimes	Forget, Because I expose it to the sun, there is no need to take vitamin D doses, Because the child gets a dose of vitamin D from formula or Cereal, Mother's preoccupation with other children	Yes	Yes	Yes	From time to time	No	No	No	No	Sometimes	Sometimes	Sometimes	Yes	Yes	Yes	less than an hour	Face and hands	Before ten in the morning	No	Never use sunscreen	I do not know
2022-08-12 18:08:24	43	Married	Bachelor	Employee	Saudi	Three kids	48	Owing house	From 10-20 thousand riyals per month	Breast feeding	Yes	TV, radio, advertisements, Doctor/Nurse	Yes	Bone health, Boosts immunity, Prevents depression, Important for hair health, Important for skin health, Important for child health and growth	Sun	Milk and dairy products, Yolk	No	All the body	Directly	Before ten in the morning	Less than an hour	No	Yes	Always	Forget	Yes	Yes	Yes	Periodically	Yes	Yes	No	No	Sometimes	Always	Sometimes	Yes	Sometimes	No	less than an hour	Face, hands, and legs	Before ten in the morning	No	Scarcely	No
2022-09-20 20:13:45	43	Married	High school	Unemployed	Saudi	Four children and more	48	Rented house	From 10-20 thousand riyals per month	Bottle feeding	Yes	Social media (Snapchat, Instagram, Facebook...)	Yes	Bone health, Prevents arthritis, Important for child health and growth	Sun, Food supplements	Milk and dairy products, Vegetables	No	Feet and legs	Indirectly (Behind the glass, for example)	Between 10 in the morning and 3 in the afternoon	From one to two hours	No	No	Do not apply	Other reasons (The child does not need vitamin D)	Yes	Yes	Yes	At the request of the doctor	Yes	Yes	No	Yes	Always	Sometimes	Sometimes	Yes	Yes	No	less than an hour	Face and hands	Before ten in the morning	No	Never use sunscreen	I do not know
2022-08-29 13:40:36	44	Married	Bachelor	Employee	Saudi	Four children and more	48	Rented house	From 10-20 thousand riyals per month	Both	Yes	TV, radio, advertisements, Social media (Snapchat, Instagram, Facebook...), Doctor/Nurse	Yes	Bone health, Boosts immunity, Prevents arthritis, Important for hair health, Prevents obesity and weight gain, Important for child health and growth	Sun	Milk and dairy products, Fruits, Fish, Yolk	No	All the body	Directly	Before ten in the morning	Less than an hour	No	No	Do not apply	Because vitamin D doses are not necessary	Yes	Yes	Yes	Periodically	No	Yes	Yes	No	never	never	Permanently	Yes	Sometimes	Yes	less than an hour	Face, hands, and legs	Before ten in the morning	Yes	Always	No
2022-09-29 09:56:50	36	Married	Master and above	Unemployed	Non-Saudi	Three kids	50	Rented house	From 5 - less than 10000 riyals per month	Breast feeding	Yes	Friends – family, Doctor/Nurse	No	Bone health, Helps healthy pregnancy, Prevents arthritis, Prevents depression, Important for hair health, Prevents obesity and weight gain, Important for child health and growth	Sun, Food, Food supplements	Milk and dairy products, Fish, Yolk, Liver	No	I do not expose my child to the sun	Directly	I do not expose my child to the sun	I do not expose my child to the sun	No	No	Scarcely	Forget, Mother's preoccupation with other children	Yes	Yes	Yes	Periodically	Yes	Yes	No	Yes	Sometimes	Scarcely	Sometimes	No	Sometimes	No	less than an hour	Face only	Before ten in the morning	Sometimes	Scarcely	No
2022-09-11 13:42:05	39	Married	Bachelor	Unemployed	Non-Saudi	Four children and more	50	Owing house	More than 20 thousand riyals per month	Breast feeding	Yes	From studying at school/university, Doctor/Nurse	Yes	Bone health, Boosts immunity, Helps healthy pregnancy, Prevents stroke, Prevents diabetes, Prevents high blood pressure, Prevents arthritis, Prevents depression, Important for hair health, Prevents obesity and weight gain, Important for skin health, Important for child health and growth	Sun	Milk and dairy products, Fish, Yolk	Yes	Feet and legs	Indirectly (Behind the glass, for example)	Other times	From one to two hours	Yes	Yes	Always	Other reasons (The child does not need vitamin D)	Yes	Yes	Yes	Periodically	Yes	Yes	Yes	Yes	Always	Always	Permanently	Yes	Yes	Yes	From one to two hours	Face, hands, and legs	Before ten in the morning	Yes	Always	No
2022-09-11 12:42:55	42	Married	Secondary	Employee	Saudi	Three kids	50	Owing house	Less than 5,000 riyals per month	Bottle feeding	Yes	Doctor/Nurse	I don't know	Bone health, Important for hair health, Important for child health and growth	Food	Milk and dairy products, Fruits, Vegetables, Fish, Yolk, Liver	Yes	Face only	Directly	Between 10 in the morning and 3 in the afternoon	6 hours and more	No	No	Scarcely	Because I expose it to the sun, there is no need to take vitamin D doses	Yes	Yes	Yes	Periodically	Yes	Yes	Yes	No	Always	Scarcely	Sometimes	Yes	Sometimes	Yes	6 hours and more	Face and hands	After three o'clock in the evening	Sometimes	Sometimes	I do not know
2022-09-24 14:25:58	44	Married	Master and above	Employee	Non-Saudi	Two children	50	Rented house	From 10-20 thousand riyals per month	Breast feeding	Yes	From studying at school/university	I don't know	Bone health, Important for child health and growth	Sun, Food, Food supplements	I don't know	Yes	Feet and legs	Indirectly (Behind the glass, for example)	Before ten in the morning	From one to two hours	No	Yes	Sometimes	Child's illness	No	Yes	Yes	Periodically	Yes	Yes	No	Yes	Sometimes	Sometimes	Permanently	Yes	Sometimes	No	less than an hour	Face and hands	Before ten in the morning	No	Scarcely	Yes
2022-09-20 12:21:00	45	Married	Bachelor	Employee	Saudi	Four children and more	50	Rented house	From 10-20 thousand riyals per month	Bottle feeding	Yes	Social media (Snapchat, Instagram, Facebook...), Friends – family, Doctor/Nurse	No	Bone health, Boosts immunity, Prevents arthritis, Important for child health and growth	Sun, Food supplements	Milk and dairy products, Vegetables, Liver	No	All the body	Directly	Before ten in the morning	I do not expose my child to the sun	No	No	Scarcely	Forget	Yes	Yes	Yes	At the request of the doctor	Yes	Yes	No	No	Scarcely	never	Scarcely	Yes	Sometimes	No	less than an hour	Face, hands, and legs	Before ten in the morning	Yes	Sometimes	I do not know
2022-09-11 14:02:41	30	Divorced	High school	Employee	Saudi	One child	52	Owing house	From 10-20 thousand riyals per month	Bottle feeding	Yes	Social media (Snapchat, Instagram, Facebook...), Friends – family	Yes	Bone health	Sun	Milk and dairy products, Fish	Yes	All the body	Indirectly (Behind the glass, for example)	Before ten in the morning	From one to two hours	No	No	Do not apply	Forget, Because I expose it to the sun, there is no need to take vitamin D doses	Yes	Yes	Yes	From time to time	No	Yes	No	No	never	Scarcely	Scarcely	Yes	Yes	Yes	From one to two hours	Face and hands	Before ten in the morning	No	Never use sunscreen	I do not know
2022-09-21 12:29:47	45	Married	Master and above	Employee	Saudi	Four children and more	54	Rented house	From 10-20 thousand riyals per month	Bottle feeding	Yes	TV, radio, advertisements, Social media (Snapchat, Instagram, Facebook...), Friends – family, Magazines, Books, Doctor/Nurse	No	Bone health, Boosts immunity, Helps healthy pregnancy, Prevents stroke, Prevents arthritis, Prevents depression, Important for hair health	Sun, Food, Food supplements	Milk and dairy products	No	I do not expose my child to the sun	Indirectly (Behind the glass, for example)	I do not expose my child to the sun	I do not expose my child to the sun	No	No	Do not apply	Forget,Other reasons (The child does not need vitamin D)	Yes	Yes	Yes	From time to time	No	Yes	No	No	Sometimes	Sometimes	Scarcely	Yes	No	No	less than an hour	Face and hands	Before ten in the morning	Yes	Sometimes	No
2022-09-11 15:40:46	47	Married	Bachelor	Unemployed	Saudi	Four children and more	54	Owing house	From 5 - less than 10000 riyals per month	Both	Yes	Social media (Snapchat, Instagram, Facebook...), Friends – family, Magazines, Books, Doctor/Nurse	Yes	Boosts immunity, Helps healthy pregnancy, Important for child health and growth	Sun	Fish, Yolk, Liver	No	Hands only	Indirectly (Behind the glass, for example)	Other times	I do not expose my child to the sun	No	No	Sometimes	Because the child gets a dose of vitamin D from formula or Cereal	Yes	Yes	Yes	Periodically	Yes	Yes	Yes	Yes	Sometimes	Sometimes	Sometimes	Yes	Yes	No	less than an hour	Face, hands, and legs	Before ten in the morning	Yes	Sometimes	No
2022-09-11 20:54:34	26	Married	High school	Unemployed	Saudi	Two children	55	Owing house	From 10-20 thousand riyals per month	Breast feeding	Yes	From studying at school/university, Doctor/Nurse	Yes	Bone health, Boosts immunity, Helps healthy pregnancy, Prevents arthritis, Prevents depression, Important for hair health, Prevents obesity and weight gain, Important for skin health, Important for child health and growth	Sun	Fish	Yes	All the body	Directly	Before ten in the morning	From one to two hours	Yes	No	Scarcely	Because I expose it to the sun, there is no need to take vitamin D doses	Yes	No	Yes	From time to time	No	No	No	No	Scarcely	Scarcely	Sometimes	Yes	Yes	Yes	From one to two hours	Face, hands, and legs	Before ten in the morning	No	Sometimes	No
2022-08-29 14:01:55	37	Married	Bachelor	Unemployed	Saudi	Four children and more	58	Rented house	From 5 - less than 10000 riyals per month	Both	Yes	TV, radio, advertisements, Doctor/Nurse	Yes	Bone health, Boosts immunity, Prevents depression, Prevents obesity and weight gain, Important for child health and growth	Sun	Milk and dairy products, Yolk	No	Feet and legs	Directly	Before ten in the morning	Less than an hour	No	No	Do not apply	Forget	Yes	Yes	Yes	At the request of the doctor	No	Yes	No	No	Scarcely	never	Permanently	Yes	Yes	No	less than an hour	Face and hands	Before ten in the morning	No	Scarcely	I do not know
2022-09-11 21:04:06	27	Married	Bachelor	Unemployed	Saudi	Two children	60	Owing house	From 5 - less than 10000 riyals per month	Both	Yes	Doctor/Nurse	Yes	Bone health, Boosts immunity, Important for hair health, Important for child health and growth	Sun	Fruits	No	All the body	Directly	Other times	From one to two hours	No	No	Do not apply	Forget	Yes	No	Yes	From time to time	Yes	No	No	Yes	Sometimes	Scarcely	Scarcely	Yes	Sometimes	No	From one to two hours	Face, hands, and legs	After three o'clock in the evening	Sometimes	Scarcely	I do not know
2022-09-11 22:24:07	29	Married	Bachelor	Unemployed	Saudi	One child	60	Owing house	From 5 - less than 10000 riyals per month	Breast feeding	Yes	Social media (Snapchat, Instagram, Facebook...)	Yes	Bone health, Boosts immunity, Prevents diabetes, Prevents high blood pressure, Prevents arthritis, Prevents depression, Important for hair health, Prevents obesity and weight gain, Important for skin health, Important for child health and growth	Sun	Milk and dairy products, Fruits, Vegetables, Fish, Yolk, Liver	Yes	All the body	Directly	Between 10 in the morning and 3 in the afternoon	Less than an hour	Yes	No	Do not apply	Other reasons (The child does not need vitamin D)	Yes	Yes	Yes	Periodically	Yes	Yes	Yes	No	Always	Always	Sometimes	Yes	Yes	Yes	less than an hour	Face, hands, and legs	From ten to three in the evening	Yes	Always	Yes
2022-09-24 15:37:14	30	Married	Bachelor	Unemployed	Saudi	Two children	60	Rented house	From 5 - less than 10000 riyals per month	Bottle feeding	Yes	TV, radio, advertisements, Social media (Snapchat, Instagram, Facebook...), Friends – family, From studying at school/university, Doctor/Nurse	I don't know	Bone health, Boosts immunity, Prevents arthritis, Important for child health and growth	Sun, Food, Food supplements	Milk and dairy products, Fruits, Vegetables, Liver	Yes	All the body	Indirectly (Behind the glass, for example)	Before ten in the morning	Less than an hour	No	Yes	Always	Forget	Yes	Yes	Yes	Periodically	Yes	No	No	Yes	Always	Sometimes	Permanently	Yes	Sometimes	No	less than an hour	Face, hands, and legs	Before ten in the morning	Yes	Always	I do not know
2022-09-18 00:00:10	35	Married	Bachelor	Employee	Saudi	Two children	60	Rented house	From 10-20 thousand riyals per month	Bottle feeding	Yes	Social media (Snapchat, Instagram, Facebook...), From studying at school/university, Doctor/Nurse	Yes	Bone health, Boosts immunity, Helps healthy pregnancy, Prevents depression, Important for hair health, Important for child health and growth	Sun, Food, Food supplements	Fish, Yolk	Yes	All the body	Directly	Before ten in the morning	From one to two hours	No	Yes	Sometimes	Forget, Because the mother is busy with the job	No	No	Yes	From time to time	Yes	Yes	Yes	No	Sometimes	Sometimes	Sometimes	Yes	Sometimes	Yes	From one to two hours	Face, hands, and legs	Before ten in the morning	Yes	Sometimes	No
2022-08-29 18:35:44	37	Married	Master and above	Employee	Saudi	Two children	60	Owing house	From 5 - less than 10000 riyals per month	Both	Yes	Magazines, Books, Doctor/Nurse	Yes	Bone health, Boosts immunity, Helps healthy pregnancy, Prevents arthritis, Prevents depression, Important for hair health, Prevents obesity and weight gain, Important for child health and growth	Sun	Milk and dairy products	Yes	I do not expose my child to the sun	Indirectly (Behind the glass, for example)	I do not expose my child to the sun	From one to two hours	No	No	Do not apply	Because the child gets a dose of vitamin D from formula or Cereal	Yes	Yes	Yes	From time to time	Yes	Yes	Yes	Yes	Sometimes	Sometimes	Sometimes	Yes	Yes	No	less than an hour	Face and hands	Before ten in the morning	No	Sometimes	No
2022-09-17 23:57:21	41	Married	High school	Employee	Saudi	Four children and more	60	Owing house	From 5 - less than 10000 riyals per month	Bottle feeding	Yes	Doctor/Nurse	Yes	Bone health, Helps healthy pregnancy, Prevents depression, Important for child health and growth	Sun	Milk and dairy products, Fish, Yolk	Yes	All the body	Directly	After three in the afternoon	From one to two hours	No	No	Do not apply	Because I expose it to the sun, there is no need to take vitamin D doses	Yes	Yes	Yes	Periodically	Yes	Yes	Yes	Yes	Always	Always	Scarcely								Never use sunscreen	No
